# Supplementary material for: An Extensive Set of Accurate Fluoride Ion Affinities for p‐Block Element Lewis Acids and Basic Design Principles for Strong Fluoride Ion Acceptors
Source: PubMed Central journal article supplement (PMC7317340; doi:10.1002/cphc.202000244), 2020-04-20
Supplement: CPHC-21-987-s001.pdf [file CPHC-21-987-s001.pdf]

# ChemPhysChem

Supporting Information

## **An Extensive Set of Accurate Fluoride Ion Affinities for *p*-Block Element Lewis Acids and Basic Design Principles for Strong Fluoride Ion Acceptors**

Philipp Erdmann, Jonas Leitner, Julia Schwarz, and Lutz Greb\*© 2020 The Authors.

Published by Wiley-VCH Verlag GmbH & Co. KGaA.

This is an open access article under the terms of the Creative Commons Attribution License, which permits use, distribution and reproduction in any medium, provided the original work is properly cited.

## 1. General details and geometry optimization

All calculations (except G3/G4) have been performed with ORCA 4.1.2 and ORCA 4.2.<sup>[1]</sup> Geometry optimizations were performed with PBEh-3c/def2-mSVP as implemented in ORCA, using *grid5* settings.<sup>[2]</sup> All calculated geometries have been confirmed as energetic minima on the potential energy surface by analytical calculation of harmonic frequencies at the PBEh-3c level. In case of negative frequencies  $>10\text{ cm}^{-1}$ , the geometries were reoptimized with *grid6*, *TightOPT* and *VeryTightSCF* settings. Unscaled ZPEs and enthalpies at 298 K were obtained from the same level of theory by using the rigid-rotor harmonic oscillator (RRHO) approximation,<sup>[3]</sup> as implemented in ORCA. As starting geometries, VSEPR structures preoptimized with UFF were used. In the case of OTf substituents, also polydentate binding modes were considered and compared in energy. Partially, the energies were pretty close in energy at PBEh-3c (around  $5\text{ kJ mol}^{-1}$ ) and might change in order at higher levels. However, only the most stable (PBEh-3c) isomer was carried over to the single point computation step.

## 2. Single point energies with canonical coupled cluster theory (CCSD(T))

As reference data for the benchmark set of small Lewis acids, FIA were computed by coupled cluster theory with single and double excitations and perturbative triples correction (CCSD(T)).<sup>[4]</sup> The frozen core approximation was used with the default number of core electrons per element (see table 9.9 in ORCA 4.2 manual). Single-determinant dominated wavefunctions in the CCSD(T) computations were secured by evaluation of the T1 diagnostics ( $< 0.02$ ).<sup>[5]</sup>

For atoms up to bromine, the correlation consistent basis sets aug-cc-pVnZ ( $n = T, Q$ ) were used.<sup>[6]</sup> For heavier atoms ( $>$  bromine), ECP-based versions of correlation consistent basis sets with weighted core functions, aug-cc-pwCVnZ-PP ( $n = T, Q$ ) were used in combination with the def2-ECP effective core potentials.<sup>[7]</sup>

The CCSD(T) total energies were extrapolated the complete basis set limit (CBS) by using a two-point extrapolation scheme<sup>[8]</sup> for the adjacent aug-cc-pVnZ level basis sets n = T,Q:

$$E^{\text{CBS}}(X,Y) = \frac{E_{\text{HF}}(X)e^{-\alpha\sqrt{X}} - E_{\text{HF}}(Y)e^{-\alpha\sqrt{Y}}}{e^{-\alpha\sqrt{X}} - e^{-\alpha\sqrt{Y}}} + \frac{X^\beta E_{\text{C}}(X) - Y^\beta E_{\text{C}}(Y)}{X^\beta - Y^\beta}$$

$E_{\text{HF}}(X)$  = HF energy of basis set with cardinal number X (X = 3 or 4);  $E_{\text{C}}(X)$  = correlation energy of basis set X;  $\alpha = 5.79$  and  $\beta = 3.05$  as calibrated in Ref<sup>[8c]</sup> A recent study on the HF-dimerization energies fully supports the excellent accuracy of this level of theory for fluoro-containing species.<sup>[9]</sup>

|                          | E(HF) X = 3  | E(HF) X = 4  | E(C) X = 3  | E(C) X = 4   | E(HF) CBS    | E(C) CBS     | E(total)CBS  | E(total)CBS in kJ mol <sup>-1</sup> | therm. Corr. PBEh-3c in kJ mol <sup>-1</sup> | CBS enthalpy in kJ mol <sup>-1</sup> | FIA CCSD(T)/CBS in kJ mol <sup>-1</sup> |
|--------------------------|--------------|--------------|-------------|--------------|--------------|--------------|--------------|-------------------------------------|----------------------------------------------|--------------------------------------|-----------------------------------------|
| <b>F</b>                 | -99.45080702 | -99.45746209 | -0.29872959 | -0.319610582 | -99.45925196 | -0.334475541 | -99.7937275  | -262008.4315                        | 6.19                                         | -262002.2392                         |                                         |
| <b>BH<sub>3</sub></b>    | -26.400299   | -26.402125   | -0.138777   | -0.143343    | -26.402616   | -0.146593    | -26.549209   | -69704.9                            | 80.6                                         | -69624.35757                         |                                         |
| <b>BH<sub>3</sub>F</b>   | -125.950095  | -125.958959  | -0.445094   | -0.470682    | -125.961343  | -0.488899    | -126.450242  | -331995.1                           | 90.6                                         | -331904.4869                         | <b>-277.9</b>                           |
| <b>BF<sub>3</sub></b>    | -323.329463  | -323.353206  | -0.885265   | -0.949554    | -323.359592  | -0.995320    | -324.354912  | -851593.8                           | 45.2                                         | -851548.5951                         |                                         |
| <b>BF<sub>3</sub>*</b>   | -422.912063  | -422.941802  | -1.184502   | -1.269982    | -422.949800  | -1.330834    | -424.280634  | -1113948.8                          | 52.9                                         | -1113895.886                         | <b>-345.1</b>                           |
| <b>BCl<sub>3</sub></b>   | -1403.376091 | -1403.388346 | -0.748288   | -0.805082    | -1403.391642 | -0.845512    | -1404.237154 | -3686824.6                          | 34.9                                         | -3686789.703                         |                                         |
| <b>BCl<sub>3</sub>F</b>  | -1502.984975 | -1503.003367 | -1.042387   | -1.121618    | -1503.008314 | -1.178022    | -1504.186336 | -3949241.2                          | 44.3                                         | -3949196.875                         | <b>-404.9</b>                           |
| <b>BBR<sub>3</sub></b>   | -7742.183043 | -7742.192675 | -0.857257   | -1.066685    | -7742.195265 | -1.215774    | -7743.411039 | -20330325.7                         | 31.9                                         | -20330293.83                         |                                         |
| <b>BBR<sub>3</sub>F</b>  | -7841.803740 | -7841.820128 | -1.148328   | -1.379264    | -7841.824536 | -1.543665    | -7843.368201 | -20592763.2                         | 41.9                                         | -20592721.33                         | <b>-425.3</b>                           |
| <b>AlF<sub>3</sub></b>   | -540.603012  | -540.633721  | -0.873272   | -0.937230    | -540.641980  | -0.982761    | -541.624741  | -1422035.8                          | 35.3                                         | -1422000.486                         |                                         |
| <b>AlF<sub>3</sub>*</b>  | -640.243387  | -640.281311  | -1.165949   | -1.251275    | -640.291511  | -1.312018    | -641.603529  | -1684530.1                          | 43.8                                         | -1684486.3                           | <b>-483.6</b>                           |
| <b>AlCl<sub>3</sub></b>  | -1620.720611 | -1620.734917 | -0.713445   | -0.772735    | -1620.738765 | -0.814943    | -1621.553707 | -4257389.3                          | 29.4                                         | -4257359.845                         |                                         |
| <b>AlCl<sub>3</sub>F</b> | -1720.369194 | -1720.391737 | -1.005090   | -1.086034    | -1720.397800 | -1.143657    | -1721.541457 | -4519907.1                          | 38.8                                         | -4519868.267                         | <b>-506.2</b>                           |
| <b>GaF<sub>3</sub></b>   | -2221.854792 | -2221.881981 | -0.966443   | -1.090562    | -2221.889293 | -1.178921    | -2223.068214 | -5836665.6                          | 32.5                                         | -5836633.077                         |                                         |
| <b>GaF<sub>3</sub>*</b>  | -2321.482532 | -2321.516774 | -1.265552   | -1.408315    | -2321.525984 | -1.509947    | -2323.035931 | -6099130.8                          | 40.7                                         | -6099090.164                         | <b>-454.8</b>                           |
| <b>SiF<sub>4</sub></b>   | -687.153337  | -687.194534  | -1.173388   | -1.259983    | -687.205614  | -1.321629    | -688.527243  | -1807728.3                          | 52.1                                         | -1807676.152                         |                                         |
| <b>SiF<sub>4</sub>*</b>  | -786.721379  | -786.766901  | -1.474355   | -1.582678    | -786.779144  | -1.659792    | -788.438936  | -2070046.4                          | 56.9                                         | -2069989.494                         | <b>-311.1</b>                           |
| <b>SiCl<sub>4</sub></b>  | -2127.244404 | -2127.264470 | -0.978680   | -1.058537    | -2127.269867 | -1.115386    | -2128.385252 | -5588075.5                          | 39.3                                         | -5588036.23                          |                                         |
| <b>SiCl<sub>4</sub>F</b> | -2226.817086 | -2226.843398 | -1.280482   | -1.382158    | -2226.850475 | -1.454539    | -2228.305014 | -5850414.8                          | 48.2                                         | -5850366.577                         | <b>-328.1</b>                           |
| <b>GeF<sub>4</sub></b>   | -2473.491751 | -2473.527488 | -1.264122   | -1.404672    | -2473.537099 | -1.504728    | -2475.041828 | -6498222.3                          | 44.0                                         | -6498178.345                         |                                         |
| <b>GeF<sub>4</sub>*</b>  | -2573.076730 | -2573.118814 | -1.564959   | -1.726701    | -2573.130133 | -1.841842    | -2574.971976 | -6760588.9                          | 52.1                                         | -6760536.797                         | <b>-356.2</b>                           |
| <b>PF<sub>5</sub></b>    | -838.310527  | -838.359352  | -1.496957   | -1.606817    | -838.372484  | -1.685025    | -840.057509  | -2205571.0                          | 61.8                                         | -2205509.167                         |                                         |
| <b>PF<sub>5</sub>*</b>   | -937.907816  | -937.961244  | -1.797513   | -1.928555    | -937.975613  | -2.021843    | -939.997456  | -2467963.3                          | 69.9                                         | -2467893.39                          | <b>-382.0</b>                           |
| <b>AsF<sub>5</sub></b>   | -2731.710992 | -2731.754247 | -1.575141   | -1.736652    | -2731.765880 | -1.851631    | -2733.617511 | -7177112.8                          | 55.5                                         | -7177057.264                         |                                         |
| <b>AsF<sub>5</sub>*</b>  | -2831.331420 | -2831.380670 | -1.873067   | -2.054514    | -2831.393916 | -2.183685    | -2833.577600 | -7439558.0                          | 63.8                                         | -7439494.203                         | <b>-434.7</b>                           |
| <b>SbF<sub>5</sub></b>   | -736.741068  | -736.780100  | -1.930541   | -2.098324    | -736.790597  | -2.217766    | -739.008363  | -1940266.5                          | 52.1                                         | -1940214.375                         |                                         |
| <b>SbF<sub>5</sub>*</b>  | -836.386354  | -836.432334  | -2.223319   | -2.412240    | -836.444700  | -2.546730    | -838.991431  | -2202772.0                          | 60.3                                         | -2202711.684                         | <b>-495.1</b>                           |
| <b>COF<sub>2</sub></b>   | -311.742038  | -311.763986  | -0.924283   | -0.982835    | -311.769889  | -1.024518    | -312.794407  | -821241.7                           | 47.2                                         | -821194.4818                         |                                         |
| <b>COF<sub>2</sub>*</b>  | -411.268500  | -411.296489  | -1.228419   | -1.307179    | -411.304016  | -1.363247    | -412.667263  | -1083457.9                          | 54.0                                         | -1083403.893                         | <b>-207.2</b>                           |
| <b>Me<sub>3</sub>Si*</b> | -407.607901  | -407.619393  | -0.718502   | -0.747266    | -407.622484  | -0.767742    | -408.390226  | -1072228.5                          | 317.2                                        | -1071911.319                         |                                         |
| <b>Me<sub>3</sub>SiF</b> | -507.424243  | -507.444800  | -1.013723   | -1.063724    | -507.450329  | -1.099319    | -508.549648  | -1335197.1                          | 331.0                                        | -1334866.086                         | <b>-952.5</b>                           |

**Table S1:** CCSD(T) derived energies [in Hartree, except where given] used for the CBS extrapolation and the herewith calculated FIA data (non-isodesmic).

### 3. Revised TMS-system anchor point

The TMS-system anchor enthalpy of  $\text{Me}_3\text{Si}^+ + \text{F}^- \rightarrow \text{Me}_3\text{SiF}$  and the experimentally known FIA of  $\text{COF}_2$  was (re)computed at the G3, G4 and the above described CCSD(T)/CBS level of theory. For the computations with the G3 and G4 composite method, Gaussian 16, Revision C.01 has been used.<sup>[10]</sup> For the deviation of the CCSD(T)/CBS enthalpies, see table S1.

|                                 | Enthalpy [Hartree] | Enthalpy [kJ mol <sup>-1</sup> ] | FIA [kJ mol <sup>-1</sup> ] |
|---------------------------------|--------------------|----------------------------------|-----------------------------|
| <b>G3</b>                       |                    |                                  |                             |
| F <sup>-</sup>                  | -99.80683          | -262042.8                        |                             |
| COF <sub>2</sub>                | -312.87769         | -821460.4                        | <b>-213.9</b>               |
| COF <sub>3</sub> <sup>-</sup>   | -412.76600         | -1083717.1                       |                             |
| Me <sub>3</sub> Si <sup>+</sup> | -408.67945         | -1072987.9                       | <b>-958.5</b>               |
| Me <sub>3</sub> SiF             | -508.85133         | -1335989.2                       |                             |
| <b>G4</b>                       |                    |                                  |                             |
| F <sup>-</sup>                  | -99.83128          | -262107.0                        |                             |
| COF <sub>2</sub>                | -312.93936         | -821622.3                        | <b>-203.4</b>               |
| COF <sub>3</sub> <sup>-</sup>   | -412.84812         | -1083932.7                       |                             |
| Me <sub>3</sub> Si <sup>+</sup> | -408.71695         | -1073086.4                       | <b>-946.7</b>               |
| Me <sub>3</sub> SiF             | -508.90881         | -1336140.1                       |                             |
| <b>CCSD(T)/CBS</b>              |                    |                                  |                             |
| F <sup>-</sup>                  |                    | -262002.2                        |                             |
| COF <sub>2</sub>                |                    | -821194.5                        | <b>-207.2</b>               |
| COF <sub>3</sub> <sup>-</sup>   |                    | -1083403.9                       |                             |
| Me <sub>3</sub> Si <sup>+</sup> |                    | -1071911.3                       | <b>-952.5</b>               |
| Me <sub>3</sub> SiF             |                    | -1334866.1                       |                             |

**Table S2:** Comparison of G3/G4 and CCSD(T)/CBS values for the FIA of the reference systems.

The FIA of  $\text{Me}_3\text{Si}^+$  for the Gaussian G3 and the G4 method differs by roughly 12 kJ mol<sup>-1</sup>, a point the might stem from the fact that for the updated G4 strategy, the higher level correction terms (HLC) have been redefined and in contrast to the G3 method differentiate between atomic anions and molecules.<sup>[11]</sup> Of all three levels of theory, the CCSD(T)/CBS computed FIA of  $\text{COF}_2$  agrees best with experiment, and led us to use the respective TMS-system anchor value of 952.5 kJ mol<sup>-1</sup> for the remainder of this work.

#### 4. Single Point Energies with DLPNO-CCSD(T) (L1 and L2)

The single point electronic energies for the compounds in the FIA(CCSD(T)/CBS) benchmark set were calculated with the linear scaling version of domain-based localized pair natural orbitals based coupled cluster theory (DLPNO-CCSD(T)), as implemented in ORCA 4.1.2 or 4.2.<sup>[12]</sup> Throughout, NormalPNO and the herewith connected threshold settings were used. As shown in table 1 (main part), tightPNO settings improve the results only marginally. Like with canonical CCSD(T), for atoms up to bromine, the correlation consistent basis sets (aug)-cc-pVnZ (n = T,Q) were used.<sup>[6]</sup> For heavier atoms (> bromine), ECP-based versions of correlation consistent basis sets with weighted core functions, (aug)-cc-pwCVnZ-PP (n = T,Q) were used, including the def2-ECP effective core potentials.<sup>[7]</sup> To speed up the HF-part, the resolution of identity and “chain of spheres” RIJCOSX approximation (*gridX6*) was used with the respective auxiliary basis sets.<sup>[13]</sup> Single-determinant dominated wavefunctions in the DLPNO-CCSD(T) computations were secured by evaluation of the T1 diagnostics (< 0.02).<sup>[5]</sup>

#### 5. Single Point Energies with Density Functional Theory

For the DFT-based benchmark, the following functional/basis set combinations were used on the PBEh-3c geometries/thermal corrections and anchored to the TMS-system (table 1, main part) or COF<sub>2</sub>-system (table S3):

BP86<sup>[14]</sup> + D3(BJ)<sup>[15]</sup> with def2-SVP<sup>[16]</sup>

B3LYP<sup>[17]</sup> + D3(BJ) with def2-TZVPP<sup>[16]</sup>

PW6B95<sup>[18]</sup> + D3(BJ) with def2-QZVPP<sup>[19]</sup>

M06-2X<sup>[20]</sup> + D3(zero) with def2-QZVPP

B2PLYP<sup>[21]</sup> + D3(BJ) with def2-QZVPP

DSD-BLYP<sup>[22]</sup> + D3(BJ) with def2-QZVPP

DSD-PBEB95<sup>[23]</sup> + D3(BJ) with def2-QZVPP

DSD-PBEP86<sup>[24]</sup> + D3(BJ) with def2-QZVPP

In all DFT computations, the resolution-of-identity<sup>[25]</sup> and “chain of spheres”<sup>[13]</sup> approximation in the form of RIJCOSX was used in combination with matching auxiliary basis sets (def2/J or AutoAux).<sup>[26]</sup> For the double-hybrid functionals including MP2 correlation, the def2/C auxiliary basis set was applied.

|                                                | BP86<br>D3BJ/<br>def2<br>SVP | PBEh-3c/<br>def2-mSVP | B3LYP<br>D3BJ/<br>T <sup>c</sup> | PW6B95<br>D3BJ/<br>Q <sup>c</sup> | M062X<br>D3(0)/<br>Q <sup>c</sup> | B2PLYP<br>D3BJ/<br>Q <sup>c</sup> | DSD-<br>BLYP-<br>D3BJ/<br>Q <sup>c</sup> | DSD-<br>PBEB95-<br>D3BJ/<br>Q <sup>c</sup> | DSD-<br>PBEP86-<br>D3BJ/<br>Q <sup>c</sup> |
|------------------------------------------------|------------------------------|-----------------------|----------------------------------|-----------------------------------|-----------------------------------|-----------------------------------|------------------------------------------|--------------------------------------------|--------------------------------------------|
| BH <sub>3</sub>                                | 313.0                        | 280.5                 | 301.7                            | 287.8                             | 269.0                             | 277.6                             | 277.0                                    | 283.8                                      | 279.7                                      |
| BF <sub>3</sub>                                | 338.0                        | 350.6                 | 338.9                            | 341.5                             | 339.7                             | 338.9                             | 341.1                                    | 344.3                                      | 340.3                                      |
| BCl <sub>3</sub>                               | 402.9                        | 428.7                 | 389.2                            | 393.0                             | 396.3                             | 392.6                             | 396.6                                    | 399.6                                      | 398.2                                      |
| BBr <sub>3</sub>                               | 441.7                        | 457.4                 | 422.1                            | 419.4                             | 424.7                             | 419.8                             | 422.1                                    | 424.9                                      | 424.0                                      |
| B(C <sub>6</sub> F <sub>5</sub> ) <sub>3</sub> | 455.9                        | 468.2                 | 428.2                            | 436.4                             | 444.0                             | 432.8                             | 437.8                                    | 434.3                                      | 438.6                                      |
| AlF <sub>3</sub>                               | 470.2                        | 477.3                 | 476.7                            | 478.7                             | 483.4                             | 480.6                             | 483.1                                    | 482.8                                      | 480.2                                      |
| AlCl <sub>3</sub>                              | 497.0                        | 536.7                 | 492.5                            | 495.6                             | 498.4                             | 501.2                             | 504.1                                    | 503.5                                      | 502.4                                      |
| GaF <sub>3</sub>                               | 434.2                        | 447.1                 | 439.3                            | 438.8                             | 450.2                             | 444.3                             | 448.3                                    | 446.1                                      | 445.6                                      |
| SiF <sub>4</sub>                               | 318.5                        | 316.8                 | 304.8                            | 313.8                             | 307.2                             | 305.8                             | 306.9                                    | 312.1                                      | 305.8                                      |
| SiCl <sub>4</sub>                              | 325.4                        | 351.8                 | 315.7                            | 323.7                             | 321.5                             | 319.1                             | 321.2                                    | 325.4                                      | 322.0                                      |
| GeF <sub>4</sub>                               | 346.8                        | 341.1                 | 347.7                            | 350.0                             | 351.1                             | 348.7                             | 350.8                                    | 352.0                                      | 348.8                                      |
| PF <sub>5</sub>                                | 400.2                        | 387.6                 | 325.5                            | 380.7                             | 380.1                             | 372.3                             | 376.3                                    | 382.6                                      | 375.9                                      |
| AsF <sub>5</sub>                               | 431.9                        | 422.3                 | 428.8                            | 430.6                             | 436.1                             | 429.5                             | 434.2                                    | 435.9                                      | 432.7                                      |
| SbF <sub>5</sub>                               | 483.1                        | 478.6                 | 485.2                            | 483.1                             | 494.7                             | 485.6                             | 491.6                                    | 490.9                                      | 489.3                                      |
|                                                |                              |                       |                                  |                                   |                                   |                                   |                                          |                                            |                                            |
| MAD                                            | 11.9                         | 15.0                  | 14.4                             | 7.3                               | 4.0                               | 7.2                               | 4.2                                      | 3.5                                        | 5.0                                        |
| RMSD                                           | 14.6                         | 17.9                  | 19.3                             | 8.4                               | 5.0                               | 8.0                               | 4.9                                      | 4.7                                        | 5.5                                        |

**Table S3:** DFT-computed FIA of benchmark set, anchored by the COF<sub>2</sub>-reference system. In comparison to the TMS-system (main part, table 1), less good MAD/RMSD are obtained.

|                                                | BP86<br>D3BJ/<br>def2<br>SVP | PBEh-3c/<br>def2-mSVP | B3LYP<br>D3BJ/<br>T <sup>c</sup> | PW6B95<br>D3BJ/<br>Q <sup>c</sup> | M062X<br>D3(0)/<br>Q <sup>c</sup> | B2PLYP<br>D3BJ/<br>Q <sup>c</sup> | DSD-<br>BLYP-<br>D3BJ/<br>Q <sup>c</sup> | DSD-<br>PBEB95-<br>D3BJ/<br>Q <sup>c</sup> | DSD-<br>PBEP86-<br>D3BJ/<br>Q <sup>c</sup> |
|------------------------------------------------|------------------------------|-----------------------|----------------------------------|-----------------------------------|-----------------------------------|-----------------------------------|------------------------------------------|--------------------------------------------|--------------------------------------------|
| BH <sub>3</sub>                                | 482.2                        | 621.7                 | 340.4                            | 307.2                             | 305.2                             | 290.5                             | 291.3                                    | 301.2                                      | 298.0                                      |
| BF <sub>3</sub>                                | 506.3                        | 423.6                 | 377.6                            | 361.0                             | 375.9                             | 351.7                             | 355.4                                    | 361.7                                      | 358.6                                      |
| BCl <sub>3</sub>                               | 571.2                        | 611.3                 | 427.9                            | 412.4                             | 432.5                             | 405.5                             | 410.8                                    | 417.0                                      | 416.5                                      |
| BBr <sub>3</sub>                               | 610.0                        | 493.7                 | 460.8                            | 438.9                             | 460.9                             | 432.6                             | 436.4                                    | 442.3                                      | 442.3                                      |
| B(C <sub>6</sub> F <sub>5</sub> ) <sub>3</sub> | 624.2                        | 565.5                 | 466.9                            | 455.8                             | 480.2                             | 445.6                             | 452.1                                    | 462.0                                      | 456.9                                      |
| AlF <sub>3</sub>                               | 638.5                        | 679.8                 | 515.4                            | 498.2                             | 519.6                             | 493.4                             | 497.4                                    | 500.2                                      | 498.5                                      |
| AlCl <sub>3</sub>                              | 665.3                        | 600.5                 | 531.2                            | 515.1                             | 534.6                             | 514.1                             | 518.4                                    | 520.9                                      | 520.7                                      |
| GaF <sub>3</sub>                               | 602.5                        | 459.9                 | 478.0                            | 458.2                             | 486.5                             | 457.1                             | 462.5                                    | 463.5                                      | 463.9                                      |
| SiF <sub>4</sub>                               | 486.8                        | 494.9                 | 343.5                            | 333.3                             | 343.5                             | 318.7                             | 321.1                                    | 329.5                                      | 324.1                                      |
| SiCl <sub>4</sub>                              | 493.7                        | 530.7                 | 354.4                            | 343.2                             | 357.7                             | 331.9                             | 335.4                                    | 342.8                                      | 340.3                                      |
| GeF <sub>4</sub>                               | 515.1                        | 477.2                 | 386.4                            | 369.4                             | 387.3                             | 361.6                             | 365.0                                    | 369.4                                      | 367.1                                      |
| PF <sub>5</sub>                                | 568.5                        | 484.2                 | 364.2                            | 400.2                             | 416.3                             | 385.2                             | 390.6                                    | 400.0                                      | 394.2                                      |
| AsF <sub>5</sub>                               | 600.2                        | 620.5                 | 467.5                            | 450.1                             | 472.3                             | 442.3                             | 448.5                                    | 453.3                                      | 451.0                                      |
| SbF <sub>5</sub>                               | 651.4                        | 590.3                 | 523.9                            | 502.5                             | 531.0                             | 498.5                             | 505.9                                    | 508.3                                      | 507.6                                      |
|                                                |                              |                       |                                  |                                   |                                   |                                   |                                          |                                            |                                            |
| MAD                                            | 169.0                        | 143.1                 | 30.2                             | 13.9                              | 32.4                              | 5.6                               | 10.1                                     | 15.9                                       | 13.5                                       |
| RMSD                                           | 169.6                        | 164.1                 | 31.9                             | 15.3                              | 32.6                              | 6.6                               | 10.4                                     | 16.2                                       | 13.8                                       |

**Table S4:** Non-isodesmic DFT-computed FIA of benchmark set. In comparison to the isodesmic reactions (main part, table 1 and table S3), much less good MAD/RMSD are obtained.

## 6. Solvation correction with COSMO-RS

The decrease in the free energy of an isolated molecule or ion by the interaction with the solvent can be obtained by several quantum chemical solvation models.<sup>[27]</sup> We choose the COSMO-RS solvation model, as implemented in ADF<sup>[28]</sup>, based on BP86-D3/TZ2P<sup>[29]</sup> single point energy calculations for the electrostatic solute-solvent interaction on the PBEh-3c gas-phase geometries.<sup>[30]</sup> With the COSMO-RS model, accurate solvation free energies with an error of about 1 kcal mol<sup>-1</sup> for neutral molecules are usually obtained.<sup>[27a, 30d]</sup> The dependency of the outcome of COSMO-RS on the DFT method has found to be very weak.<sup>[31]</sup> The validity of predictions of the solvation free energies for charged species is indicated by good performance in the computation of pK<sub>a</sub> values in organic solvents.<sup>[32]</sup> The obtained value  $\Delta G_{\text{solv}}$  reflects equal concentrations in the gas phase and in solution, e.g. the transfer from a 1M ideal gas (24.79 bar) to a 1M ideal solution.<sup>[27a, 33]</sup>

It should be noted, that the mixing of a solvation *free* energy ( $\Delta G_{\text{solv}}$ ) is obtained by most quantum-theoretical solvation models. The FIA on the other hand, is a reaction *enthalpy* ( $\Delta H$ ). Mixing those two values is not strictly correct. However, in contrast to the herein presented FIA<sub>(gas)</sub> values, the FIA<sub>solv</sub> values are not intended to be absolute, and in any case strongly affected by the problematic solvation free energy of an isolated fluoride ion. To avoid confusion, in eq. 4 of the manuscript,  $\Delta E_{\text{solv}}$  was written instead of  $\Delta G_{\text{solv}}$ .

## Tables of computed FIA

|                  |                                                  | DLPNO-<br>CCSD(T)/<br>aug-cc-pVQZ | DLPNO-<br>CCSD(T)/<br>cc-pVQZ                   | DSD-<br>BLYP(D3BJ)/<br>QZVPP        |                     |                  |             |                |              |
|------------------|--------------------------------------------------|-----------------------------------|-------------------------------------------------|-------------------------------------|---------------------|------------------|-------------|----------------|--------------|
| TMS_Kation       |                                                  | -1071846.28                       | -1071850.81                                     | -1072693.35                         |                     |                  |             |                |              |
| TMSF             |                                                  | -1334753.89                       | -1334745.1                                      | -1335720.81                         |                     |                  |             |                |              |
| Method           |                                                  | TMS-anchor                        |                                                 |                                     | 952.5               |                  |             |                |              |
| aug-cc-pVQZ (L1) |                                                  |                                   |                                                 |                                     |                     |                  |             |                |              |
| cc-pVQZ (L2)     |                                                  |                                   |                                                 |                                     |                     |                  |             |                |              |
| DSD-BLYP (L3)    |                                                  |                                   |                                                 |                                     |                     |                  |             |                |              |
|                  |                                                  |                                   |                                                 |                                     | fluoride (COSMO-RS) | deltaG_solv kcal |             | deltaG_solv kj |              |
|                  |                                                  |                                   |                                                 |                                     |                     | -75.05202        | -314.017652 |                |              |
| Compound         | total thermal correction [kJ mol <sup>-1</sup> ] | electr. energy [Hartree] L1/L2/L3 | electr. energy [kJ mol <sup>-1</sup> ] L1/L2/L3 | electr. Energy + thermal correction | dH (eq 1)           | FIA              | COSMO-RS    | Diff_solv      | FIA_solv     |
|                  |                                                  |                                   |                                                 |                                     |                     |                  | kcal        | kJ             |              |
| BH3              | 80.6                                             | -26.54553                         | -69695.3                                        | -69614.7                            |                     |                  | 0.3         |                |              |
| BH3_F            | 90.6                                             | -126.42914                        | -331939.7                                       | -331849.1                           | 673.2               | <b>279.3</b>     | -57.4       | 72.5           | <b>206.8</b> |
| BF3              | 45.2                                             | -324.30096                        | -851452.2                                       | -851406.9                           |                     |                  | -1.2        |                |              |
| BF3_F            | 52.9                                             | -424.20918                        | -1113761.2                                      | -1113708.3                          | 606.3               | <b>346.2</b>     | -55.3       | 87.8           | <b>258.5</b> |
| BCl3             | 34.9                                             | -1404.19189                       | -3686705.8                                      | -3686670.9                          |                     |                  | -3.9        |                |              |
| BCl3_F           | 44.3                                             | -1504.12268                       | -3949074.1                                      | -3949029.7                          | 548.7               | <b>403.8</b>     | -49.3       | 123.9          | <b>279.8</b> |
| BBr3             | 31.9                                             | -7743.24973                       | -20329902.2                                     | -20329870.3                         |                     |                  | -5.3        |                |              |
| BBr3_F           | 41.9                                             | -7843.19006                       | -20592295.5                                     | -20592253.6                         | 524.3               | <b>428.2</b>     | -48.3       | 134.0          | <b>294.2</b> |
| BI3              | 30.0                                             | -917.08197                        | -2407798.7                                      | -2407768.7                          |                     |                  | -7.7        |                |              |
| BI3_F            | 40.6                                             | -1017.02937                       | -2670210.6                                      | -2670170.0                          | 506.3               | <b>446.2</b>     | -46.9       | 149.9          | <b>296.2</b> |
| B(NH2)3          | 243.2                                            | -192.60105                        | -505674.1                                       | -505430.9                           |                     |                  | -4.9        |                |              |
| B(NH2)3_F        | 250.4                                            | -292.42278                        | -767756.0                                       | -767505.6                           | 832.9               | <b>119.6</b>     | -56.6       | 97.8           | <b>21.8</b>  |
| B(OH)3           | 146.0                                            | -252.24412                        | -662266.9                                       | -662121.0                           |                     |                  | -4.6        |                |              |
| B(OH)3_F         | 150.6                                            | -352.09171                        | -924416.8                                       | -924266.2                           | 762.4               | <b>190.1</b>     | -59.6       | 83.9           | <b>106.2</b> |
| B(SH)3           | 109.3                                            | -1219.96042                       | -3203006.1                                      | -3202896.8                          |                     |                  | -5.9        |                |              |
| B(SH)3_F         | 116.7                                            | -1319.85417                       | -3465277.1                                      | -3465160.5                          | 644.0               | <b>308.5</b>     | -49.4       | 132.1          | <b>176.4</b> |
| B(CH3)3          | 325.5                                            | -144.35889                        | -379014.3                                       | -378688.7                           |                     |                  | -2.4        |                |              |
| B(CH3)3_F        | 333.0                                            | -244.22958                        | -641224.8                                       | -640891.7                           | 704.6               | <b>247.9</b>     | -49.7       | 116.2          | <b>131.7</b> |
| BPh3             | 791.3                                            | -718.63983                        | -1886788.9                                      | -1885997.6                          |                     |                  | -9.8        |                |              |
| BPh3_F           | 795.5                                            | -818.53664                        | -2149067.9                                      | -2148272.5                          | 632.7               | <b>319.8</b>     | -47.6       | 155.9          | <b>163.9</b> |
| B(CCH)3          | 188.4                                            | -254.69153                        | -668692.6                                       | -668504.3                           |                     |                  | -6.1        |                |              |
| B(CCH)3_F        | 195.5                                            | -354.59478                        | -930988.6                                       | -930793.1                           | 618.8               | <b>333.7</b>     | -54.3       | 112.5          | <b>221.2</b> |
| B(C2F5)3         | 286.9                                            | -1749.62925                       | -4593651.6                                      | -4593364.7                          |                     |                  | -4.7        |                |              |
| B(C2F5)3_F       | 295.3                                            | -1849.62711                       | -4856196.0                                      | -4855900.7                          | 371.7               | <b>580.8</b>     | -40.7       | 163.4          | <b>417.5</b> |
| B(C6F5)3         | 498.9                                            | -2205.97423                       | -5791785.3                                      | -5791286.4                          |                     |                  | -10.1       |                |              |
| B(C6F5)3_F       | 503.4                                            | -2305.91493                       | -6054179.7                                      | -6053676.3                          | 504.4               | <b>448.1</b>     | -38.8       | 194.1          | <b>254.0</b> |
| B(OC6F5)3        | 546.1                                            | -2431.51717                       | -6383948.3                                      | -6383402.3                          |                     |                  | -12.0       |                |              |
| B(OC6F5)3_F      | 550.5                                            | -2531.44672                       | -6646313.4                                      | -6645762.9                          | 533.7               | <b>418.8</b>     | -40.5       | 195.2          | <b>223.7</b> |
| B(OC(CF3))3      | 581.7306                                         | -3400.72741                       | -8928609.8                                      | -8928028.1                          |                     |                  | -7.5        |                |              |
| B(OC(CF3))3_F    | 583.6534                                         | -3500.65769                       | -9190976.8                                      | -9190393.1                          | 529.2               | <b>423.3</b>     | -36.8       | 191.1          | <b>232.2</b> |
| B(OTf)3          | 322.7                                            | -2906.59573                       | -7631267.1                                      | -7630944.4                          |                     |                  | -10.3       |                |              |
| B(OTf)3_F        | 331.2                                            | -3006.58778                       | -7893796.2                                      | -7893465.0                          | 387.0               | <b>565.5</b>     | -42.1       | 181.3          | <b>384.2</b> |
| B(N(C6F5)2)3     | 1044.3                                           | -4554.17488                       | -11956986.1                                     | -11955941.8                         |                     |                  | -16.4       |                |              |
| B(N(C6F5)2)3_F   | 1047.8                                           | -4654.13557                       | -12219432.9                                     | -12218385.1                         | 584.1               | <b>368.4</b>     | -38.9       | 219.9          | <b>148.5</b> |
| AlH3             | 60.3                                             | -243.77214                        | -640023.7                                       | -639963.4                           |                     |                  | -2.1        |                |              |
| AlH3_F           | 69.2                                             | -343.69515                        | -902371.6                                       | -902302.4                           | 568.7               | <b>383.8</b>     | -49.5       | 115.7          | <b>268.2</b> |
| AlF3             | 35.2                                             | -541.56923                        | -1421890.0                                      | -1421854.8                          |                     |                  | -5.5        |                |              |
| AlF3_F           | 43.72                                            | -641.53029                        | -1684337.8                                      | -1684294.1                          | 468.3               | <b>484.2</b>     | -51.8       | 120.6          | <b>363.6</b> |
| AlCl3            | 29.4                                             | -1621.50692                       | -4257266.4                                      | -4257237.0                          |                     |                  | -6.6        |                |              |
| AlCl3_F          | 38.8                                             | -1721.47641                       | -4519736.3                                      | -4519697.5                          | 447.1               | <b>505.4</b>     | -47.2       | 144.3          | <b>361.1</b> |
| AlBr3            | 27.7                                             | -7960.57087                       | -20900478.8                                     | -20900451.1                         |                     |                  | -7.5        |                |              |
| AlBr3_F          | 37.4                                             | -8060.54330                       | -21162956.4                                     | -21162919.1                         | 439.7               | <b>512.8</b>     | -46.7       | 150.1          | <b>362.7</b> |
| AlI3             | 26.8                                             | -1134.41498                       | -2978406.5                                      | -2978379.7                          |                     |                  | -9.6        |                |              |
| AlI3_F           | 36.7                                             | -1234.38726                       | -3240883.7                                      | -3240847.0                          | 440.3               | <b>512.2</b>     | -46.1       | 161.4          | <b>350.9</b> |
| Al(NH2)3         | 227.6                                            | -409.81590                        | -1075971.6                                      | -1075744.0                          |                     |                  | -5.2        |                |              |
| Al(NH2)3_F       | 234.1                                            | -509.71224                        | -1338249.5                                      | -1338015.4                          | 636.3               | <b>316.2</b>     | -53.8       | 110.8          | <b>205.4</b> |
| Al(OH)3          | 128.9                                            | -469.47616                        | -1232609.7                                      | -1232480.8                          |                     |                  | -7.1        |                |              |
| Al(OH)3_F        | 136.9                                            | -569.39636                        | -1494950.2                                      | -1494813.2                          | 575.2               | <b>377.3</b>     | -56.8       | 105.7          | <b>271.6</b> |
| Al(SH)3          | 99.5                                             | -1437.23268                       | -3773454.4                                      | -3773354.9                          |                     |                  | -8.2        |                |              |
| Al(SH)3_F        | 108.5                                            | -1537.17912                       | -4035863.8                                      | -4035755.3                          | 507.2               | <b>445.3</b>     | -47.8       | 148.0          | <b>297.3</b> |
| AlMe3            | 311.9                                            | -361.57606                        | -949317.9                                       | -949006.0                           |                     |                  | -4.1        |                |              |
| AlMe3_F          | 318.3                                            | -461.49240                        | -1211648.3                                      | -1211330.0                          | 583.7               | <b>368.8</b>     | -47.4       | 133.0          | <b>235.8</b> |
| AlPh3            | 780.3                                            | -935.84255                        | -2457054.6                                      | -2456274.3                          |                     |                  | -11.6       |                |              |
| AlPh3_F          | 785.0                                            | -1035.78023                       | -2719441.0                                      | -2718656.0                          | 526.0               | <b>426.5</b>     | -47.8       | 162.4          | <b>264.1</b> |
| Al(CCH)3         | 178.9                                            | -471.93456                        | -1239064.2                                      | -1238885.3                          |                     |                  | -8.5        |                |              |
| Al(CCH)3_F       | 185.7                                            | -571.88120                        | -1501474.1                                      | -1501288.4                          | 504.5               | <b>448.0</b>     | -52.5       | 129.8          | <b>318.2</b> |
| Al(C2F5)3        | 276.1                                            | -1966.85888                       | -5163988.0                                      | -5163711.9                          |                     |                  | -8.2        |                |              |
| Al(C2F5)3_F      | 283.7                                            | -2066.86659                       | -5426558.2                                      | -5426274.5                          | 345.0               | <b>607.5</b>     | -39.7       | 182.0          | <b>425.5</b> |
| Al(C6F5)3        | 486.6                                            | -2423.20777                       | -6362132.0                                      | -6361645.41                         |                     |                  | -11.9       |                |              |
| Al(C6F5)3_F      | 495.9                                            | -2523.18675                       | -6624626.8                                      | -6624130.95                         | 408.7               | <b>543.8</b>     | -39.2       | 199.8          | <b>344.0</b> |
| Al(OC6F5)3       | 530.4                                            | -2648.77998                       | -6954371.8                                      | -6953841.4                          |                     |                  | -13.8       |                |              |
| Al(OC6F5)3_F     | 541.1                                            | -2748.75855                       | -7216865.6                                      | -7216324.4                          | 411.3               | <b>541.2</b>     | -39.9       | 205.0          | <b>336.2</b> |
| Al(OC(CF3))3     | 570.8626                                         | -3618.00968                       | -9499084.4                                      | -9498513.6                          |                     |                  | -8.6        |                |              |
| Al(OC(CF3))3_F   | 576.6728                                         | -3717.98837                       | -9761578.5                                      | -9761001.8                          | 406.1               | <b>546.4</b>     | -37.5       | 193.3          | <b>353.1</b> |
| Al(OTf)3         | 313.5                                            | -3123.92907                       | -8201875.8                                      | -8201562.3                          |                     |                  | -11.0       |                |              |
| Al(OTf)3_F       | 319.5                                            | -3223.90033                       | -8464350.3                                      | -8464030.8                          | 439.1               | <b>513.4</b>     | -44.1       | 175.6          | <b>337.8</b> |
| Al(N(C6F5)2)3    | 1031.8                                           | -4771.62748                       | -12527908.0                                     | -12526876.1                         |                     |                  | -17.9       |                |              |
| Al(N(C6F5)2)3_F  | 1039.1                                           | -4871.65539                       | -12790531.2                                     | -12789492.1                         | 411.5               | <b>541.0</b>     | -39.5       | 223.7          | <b>317.3</b> |
| GaH3             | 61.2                                             | -1925.28532                       | -5054836.6                                      | -5054775.5                          |                     |                  | -0.4        |                |              |



|                 |          |              |             |             |       |              |       |       |              |
|-----------------|----------|--------------|-------------|-------------|-------|--------------|-------|-------|--------------|
| GaH3_F          | 69.0     | -2025.17687  | -5317101.9  | -5317032.9  | 650.2 | <b>302.3</b> | -50.5 | 104.3 | <b>198.0</b> |
| GaF3            | 32.5     | -2222.96914  | -5836405.5  | -5836373.0  |       |              | -4.4  |       |              |
| GaF3_f          | 40.7     | -2322.92074  | -6098828.4  | -6098787.7  | 492.8 | <b>459.7</b> | -51.0 | 119.3 | <b>340.4</b> |
| GaCl3           | 27.8     | -3302.96518  | -8671935.1  | -8671907.3  |       |              | -5.5  |       |              |
| GaCl3_F         | 36.7     | -3402.91251  | -8934346.8  | -8934310.1  | 504.8 | <b>447.7</b> | -47.1 | 140.1 | <b>307.6</b> |
| GaBr3           | 26.3     | -9642.04104  | -25315178.8 | -25315152.4 |       |              | -6.7  |       |              |
| GaBr3_F         | 35.6     | -9741.98871  | -25577591.4 | -25577555.8 | 504.3 | <b>448.2</b> | -46.8 | 146.0 | <b>302.2</b> |
| GaI3            | 25.8     | -2825.25361  | -7417703.4  | -7417677.6  |       |              | -8.8  |       |              |
| GaI3_F          | 35.1     | -2925.19834  | -7680108.2  | -7680073.1  | 512.0 | <b>440.5</b> | -46.4 | 156.7 | <b>283.8</b> |
| Ga(NH2)3        | 226.1    | -2091.27825  | -5490651.0  | -5490425.0  |       |              | -5.0  |       |              |
| Ga(NH2)3_F      | 233.6    | -2191.15621  | -5752880.6  | -5752647.0  | 685.6 | <b>266.9</b> | -53.0 | 113.0 | <b>153.9</b> |
| Ga(OH)3         | 128.1    | -2150.90744  | -5647207.5  | -5647079.4  |       |              | -6.4  |       |              |
| Ga(OH)3_F       | 134.7    | -2250.81355  | -5909511.0  | -5909376.3  | 610.8 | <b>341.7</b> | -55.4 | 109.0 | <b>232.7</b> |
| Ga(SH)3         | 99.2     | -3118.71713  | -8188191.8  | -8188092.6  |       |              | -7.2  |       |              |
| Ga(SH)3_F       | 106.9    | -3218.63502  | -8450526.2  | -8450419.3  | 580.9 | <b>371.6</b> | -48.1 | 142.6 | <b>229.0</b> |
| GaMe3           | 310.5    | -2043.08208  | -5364112.0  | -5363801.5  |       |              | -3.2  |       |              |
| GaMe3_F         | 318.6    | -2142.96699  | -5626359.8  | -5626041.2  | 667.9 | <b>284.6</b> | -48.4 | 124.8 | <b>159.8</b> |
| GaPh3           | 779.6    | -2617.34950  | -6871851.1  | -6871071.5  |       |              | -10.9 |       |              |
| GaPh3_F         | 783.8    | -2717.25751  | -7134159.6  | -7133375.8  | 603.3 | <b>349.2</b> | -49.2 | 153.6 | <b>195.6</b> |
| Ga(CCH)3        | 42.0     | -2153.42929  | -5653828.6  | -5653786.6  |       |              | -7.3  |       |              |
| Ga(CCH)3_F      | 43.5     | -2253.34682  | -5916162.1  | -5916118.6  | 575.7 | <b>376.8</b> | -52.8 | 123.7 | <b>253.1</b> |
| Ga(C2F5)3       | 275.7    | -3648.37236  | -9578801.6  | -9578525.9  |       |              | -6.9  |       |              |
| Ga(C2F5)3_F     | 282.5    | -3748.34396  | -9841277.1  | -9840994.6  | 438.9 | <b>513.6</b> | -40.4 | 173.8 | <b>339.7</b> |
| Ga(C6F5)3       | 487.9    | -4104.70186  | -10776894.7 | -10776406.8 |       |              | -11.4 |       |              |
| Ga(C6F5)3_F     | 494.3    | -4204.64575  | -11039297.4 | -11038803.1 | 498.0 | <b>454.5</b> | -40.1 | 193.8 | <b>260.7</b> |
| Ga(OC6F5)3      | 527.9    | -4330.19872  | -11368936.7 | -11368408.9 |       |              | -13.2 |       |              |
| Ga(OC6F5)2_3_F  | 538.4    | -4430.15421  | -11631369.9 | -11630831.5 | 471.7 | <b>480.8</b> | -40.4 | 200.5 | <b>280.3</b> |
| Ga(OC(CF3))3    | 568.3964 | -5299.42185  | -13913632.1 | -13913063.7 |       |              | -8.4  |       |              |
| Ga(OC(CF3))3_F  | 575.8368 | -5399.38376  | -14176082.1 | -14175506.2 | 451.7 | <b>500.8</b> | -37.7 | 191.3 | <b>309.4</b> |
| Ga(OTf)3        | 309.9    | -4805.36572  | -12616487.7 | -12616177.8 |       |              | -9.6  |       |              |
| Ga(OTf)3_F      | 320.3    | -4905.32991  | -12878943.7 | -12878623.4 | 462.0 | <b>490.5</b> | -42.5 | 176.2 | <b>314.3</b> |
| Ga(N(C6F5)2)3   | 1028.4   | -6453.69883  | -16944186.3 | -16943157.9 |       |              | -15.3 |       |              |
| Ga(N(C6F5)2)3_F | 1037.0   | -6553.69544  | -17206727.4 | -17205690.4 | 495.0 | <b>457.5</b> | -39.9 | 211.1 | <b>246.4</b> |
| SiH4            | 94.4     | -291.45168   | -765206.4   | -765112.0   |       |              | -1.0  |       |              |
| SiH4_F          | 99.7     | -391.28053   | -1027307.0  | -1027207.3  | 812.3 | <b>140.2</b> | -34.9 | 172.1 | <b>-31.9</b> |
| SiF4            | 52.1     | -688.45223   | -1807531.3  | -1807479.2  |       |              | -1.6  |       |              |
| SiF4_F          | 56.9     | -788.34564   | -2069801.5  | -2069744.6  | 642.3 | <b>310.2</b> | -42.0 | 145.1 | <b>165.1</b> |
| SiCl4           | 39.3     | -2128.32116  | -5587907.2  | -5587868.0  |       |              | -5.0  |       |              |
| SiCl4_F         | 48.2     | -2228.22922  | -5850199.3  | -5850151.1  | 624.5 | <b>328.0</b> | -45.4 | 145.1 | <b>182.9</b> |
| SiBr4           | 36.3     | -10580.40182 | -27778845.0 | -27778808.7 |       |              | -6.9  |       |              |
| SiBr4_F         | 45.8     | -10680.31006 | -28041154.1 | -28041108.2 | 608.0 | <b>344.5</b> | -44.8 | 155.4 | <b>189.0</b> |
| SiI4            | 34.9     | -1478.86721  | -3882765.9  | -3882730.9  |       |              | -10.0 |       |              |
| SiI4_F          | 44.7     | -1578.77850  | -4145083.0  | -4145038.2  | 600.3 | <b>352.2</b> | -44.8 | 168.5 | <b>183.7</b> |
| Si(NH2)4        | 311.0    | -512.79916   | -1346354.2  | -1346043.3  |       |              | -6.4  |       |              |
| Si(NH2)4_F      | 318.8    | -612.64079   | -1608488.4  | -1608169.6  | 781.3 | <b>171.2</b> | -40.6 | 170.9 | <b>0.4</b>   |
| Si(OH)4         | 176.5    | -592.34102   | -1555191.4  | -1555014.9  |       |              | -7.1  |       |              |
| Si(OH)4_F       | 187.9    | -692.20359   | -1817380.5  | -1817192.6  | 729.9 | <b>222.6</b> | -43.8 | 160.7 | <b>62.0</b>  |
| Si(SH)4         | 134.8    | -1882.64322  | -4942879.8  | -4942745.0  |       |              | -8.4  |       |              |
| Si(SH)4_F       | 144.9    | -1982.54363  | -5205168.3  | -5205023.4  | 629.2 | <b>323.3</b> | -43.6 | 166.5 | <b>156.8</b> |
| SiMe4           | 425.0    | -448.52203   | -1177594.6  | -1177169.6  |       |              | -3.6  |       |              |
| SiMe4_F         | 429.9    | -548.34828   | -1439688.4  | -1439258.5  | 818.7 | <b>133.8</b> | -35.7 | 179.8 | <b>-46.0</b> |
| SiPh4           | 1043.4   | -1214.19662  | -3187873.2  | -3186829.9  |       |              | -13.2 |       |              |
| SiPh4_F         | 1047.0   | -1314.02805  | -3449980.6  | -3448933.6  | 803.9 | <b>148.6</b> | -45.4 | 179.2 | <b>-30.6</b> |
| Si(CCH)4        | 241.1    | -595.61967   | -1563799.4  | -1563558.3  |       |              | -8.6  |       |              |
| Si(CCH)4_F      | 246.4    | -695.49230   | -1826015.0  | -1825768.6  | 697.3 | <b>255.2</b> | -53.1 | 127.7 | <b>127.6</b> |
| Si(C2F5)4       | 371.6    | -2588.87031  | -6797079.0  | -6796707.4  |       |              | -5.3  |       |              |
| Si(C2F5)4_F     | 378.1    | -2688.80996  | -7059470.5  | -7059092.4  | 522.6 | <b>429.9</b> | -38.2 | 176.2 | <b>253.7</b> |
| Si(C6F5)4       | 655.0    | -3197.33139  | -8394593.6  | -8393938.6  |       |              | -13.0 |       |              |
| Si(C6F5)4_F     | 660.4    | -3297.22987  | -8656877.0  | -8656216.6  | 616.3 | <b>336.2</b> | -36.5 | 215.9 | <b>120.4</b> |
| Si(OC6F5)4      | 711.4    | -3498.04554  | -9184118.6  | -9183407.2  |       |              | -14.8 |       |              |
| Si(OC6F5)4_F    | 721.1    | -3597.98157  | -9446500.6  | -9445779.6  | 521.9 | <b>430.6</b> | -37.3 | 219.7 | <b>210.7</b> |
| Si(OC(CF3))4    | 764.1458 | -4790.33746  | -12577031.0 | -12576266.8 |       |              | -9.0  |       |              |
| Si(OC(CF3))4_F  | 766.612  | -4890.24765  | -12839345.2 | -12838578.6 | 582.5 | <b>370.0</b> | -35.3 | 204.1 | <b>165.8</b> |
| Si(OTf)4        | 415.9    | -4131.50139  | -10847256.9 | -10846841.0 |       |              | -12.5 |       |              |
| Si(OTf)4_F      | 425.4    | -4231.47606  | -11109740.4 | -11109315.0 | 433.6 | <b>518.9</b> | -43.2 | 185.6 | <b>333.3</b> |
| Si(N(C6F5)2)4   | 1375.1   | -6328.37649  | -16615152.5 | -16613777.4 |       |              | -20.9 |       |              |
| Si(N(C6F5)2)4_F | 1380.1   | -6428.34311  | -16877614.8 | -16876234.8 | 570.1 | <b>382.4</b> | -39.1 | 237.8 | <b>144.6</b> |
| GeH4            | 92.6     | -2078.05125  | -5455923.6  | -5455830.9  |       |              | 0.5   |       |              |
| GeH4_F          | 95.8     | -2177.86867  | -5717994.2  | -5717898.4  | 840.1 | <b>112.4</b> | -51.3 | 97.4  | <b>15.0</b>  |
| GeF4            | 44.0     | -2474.92812  | -6497923.8  | -6497879.8  |       |              | -2.8  |       |              |
| GeF4_F          | 52.1     | -2574.83976  | -6760241.8  | -6760189.7  | 597.7 | <b>354.8</b> | -50.5 | 114.2 | <b>240.6</b> |
| GeCl4           | 36.6     | -3914.87863  | -10278513.8 | -10278477.3 |       |              | -5.6  |       |              |
| GeCl4_F         | 45.4     | -4014.77838  | -10540800.6 | -10540755.3 | 629.6 | <b>322.9</b> | -47.0 | 140.8 | <b>182.1</b> |
| GeBr4           | 34.4     | -12366.97787 | -32469500.4 | -32469466.0 |       |              | -7.5  |       |              |
| GebBr4_F        | 43.6     | -12466.87710 | -32731785.8 | -32731742.3 | 631.4 | <b>321.1</b> | -47.0 | 148.5 | <b>172.6</b> |
| GeI4            | 33.5     | -3275.59453  | -8600073.4  | -8600039.9  |       |              | -10.6 |       |              |
| GeI4_F          | 42.8     | -3375.48527  | -8862336.6  | -8862293.7  | 653.8 | <b>298.7</b> | -47.1 | 161.4 | <b>137.3</b> |
| Ge(NH2)4        | 306.0    | -2299.33181  | -6036895.7  | -6036589.7  |       |              | -7.0  |       |              |
| Ge(NH2)4_F      | 314.3    | -2399.17916  | -6299044.9  | -6298730.6  | 766.6 | <b>185.9</b> | -53.9 | 117.9 | <b>68.0</b>  |
| Ge(OH)4         | 171.8    | -2378.84465  | -6245656.6  | -6245484.9  |       |              | -7.5  |       |              |
| Ge(OH)4_F       | 182.9    | -2478.72049  | -6507880.6  | -6507697.7  | 694.8 | <b>257.7</b> | -55.2 | 114.4 | <b>143.3</b> |
| Ge(SH)4         | 132.3    | -3669.22209  | -9633542.6  | -9633410.3  |       |              | -8.6  |       |              |
| Ge(SH)4_F       | 141.5    | -3769.10901  | -9895795.7  | -9895654.2  | 663.7 | <b>288.8</b> | -48.3 | 148.1 | <b>140.7</b> |
| GeMe4           | 423.5    | -2235.10639  | -5868271.8  | -5867848.3  |       |              | -3.5  |       |              |
| GeMe4_F         | 427.0    | -2334.91965  | -6130331.5  | -6129904.5  | 851.4 | <b>101.1</b> | -47.8 | 128.8 | <b>-27.7</b> |
| GePh4           | 1040.5   | -3000.77967  | -7878547.0  | -7877506.5  |       |              | -13.3 |       |              |
| GePh4_F         | 1044.1   | -3100.58729  | -8140591.9  | -8139547.8  | 866.3 | <b>86.2</b>  | -49.3 | 163.6 | <b>-77.4</b> |
| Ge(CCH)4        | 238.4    | -2382.19677  | -6254457.6  | -6254219.2  |       |              | -8.6  |       |              |
| Ge(CCH)4_F      | 243.1    | -2482.05025  | -6516622.9  | -6516379.9  | 746.9 | <b>205.6</b> | -55.1 | 119.4 | <b>86.1</b>  |
| Ge(C2F5)4       | 369.3    | -4375.47394  | -11487806.8 | -11487437.6 |       |              | -5.3  |       |              |

|                 |          |              |             |             |       |              |       |       |              |
|-----------------|----------|--------------|-------------|-------------|-------|--------------|-------|-------|--------------|
| Ge(C2F5)4_F     | 374.8    | -4475.38062  | -11750111.8 | -11749737.0 | 608.2 | <b>344.3</b> | -38.9 | 173.6 | <b>170.8</b> |
| Ge(C6F5)4       | 652.2    | -4983.91213  | -13085261.3 | -13084609.1 |       |              | -13.2 |       |              |
| Ge(C6F5)4_F     | 657.2    | -5083.78830  | -13347486.2 | -13346829.0 | 674.3 | <b>278.2</b> | -39.4 | 204.5 | <b>73.7</b>  |
| Ge(OC6F5)4      | 706.2    | -5284.54429  | -13874571.0 | -13873864.8 |       |              | -14.7 |       |              |
| Ge(OC6F5)4_F    | 716.2    | -5384.48250  | -14136958.8 | -14136242.5 | 516.6 | <b>435.9</b> | -40.1 | 207.7 | <b>228.3</b> |
| Ge(OC(CF3))4    | 759.1298 | -6576.82968  | -17267466.3 | -17266707.2 |       |              | -9.1  |       |              |
| Ge(OC(CF3))4_F  | 764.6056 | -6676.75367  | -17529816.8 | -17529052.2 | 549.3 | <b>403.2</b> | -35.7 | 203.1 | <b>200.1</b> |
| Ge(OTf)4        | 411.4    | -5918.01921  | -15537759.4 | -15537348.0 |       |              | -12.4 |       |              |
| Ge(OTf)4_F      | 423.2    | -6017.99655  | -15800249.9 | -15799826.7 | 428.9 | <b>523.6</b> | -43.0 | 185.8 | <b>337.8</b> |
| Ge(N(C6F5)2)4   | 1371.6   | -8115.54324  | -21307358.8 | -21305987.2 |       |              | -21.1 |       |              |
| Ge(N(C6F5)2)4_F | 1376.7   | -8215.50453  | -21569807.1 | -21568430.5 | 584.2 | <b>368.3</b> | -40.1 | 234.5 | <b>133.8</b> |
| SnH4            | 81.3     | -216.31040   | -567923.0   | -567841.7   |       |              | 0.2   |       |              |
| SnH4_F          | 86.2     | -316.14345   | -830034.6   | -829948.4   | 800.8 | <b>151.7</b> | -28.5 | 194.1 | <b>-42.4</b> |
| SnF4            | 41.2     | -613.16530   | -1609865.5  | -1609824.3  |       |              | -5.0  |       |              |
| SnF4_F          | 49.2     | -713.09860   | -1872240.4  | -1872191.1  | 540.8 | <b>411.7</b> | -47.9 | 134.7 | <b>277.1</b> |
| SnCl4           | 35.5     | -2053.21105  | -5390705.6  | -5390670.1  |       |              | -6.8  |       |              |
| SnCl4_F         | 44.2     | -2153.12492  | -5653029.5  | -5652985.3  | 592.4 | <b>360.1</b> | -44.8 | 154.9 | <b>205.2</b> |
| SnBr4           | 33.8     | -10542.16472 | -27678453.5 | -27678419.7 |       |              | -8.4  |       |              |
| SnBr4_F         | 42.7     | -10642.08005 | -27940781.2 | -27940738.5 | 588.8 | <b>363.7</b> | -44.6 | 162.8 | <b>200.9</b> |
| SnI4            | 33.1     | -1403.76075  | -3685573.8  | -3685540.7  |       |              | -11.4 |       |              |
| SnI4_F          | 42.1     | -1503.66364  | -3947868.9  | -3947826.7  | 621.6 | <b>330.9</b> | -44.7 | 174.8 | <b>156.1</b> |
| Sn(NH2)4        | 302.0    | -437.57056   | -1148841.5  | -1148539.5  |       |              | -7.8  |       |              |
| Sn(NH2)4_F      | 309.4    | -537.43826   | -1411044.1  | -1410734.8  | 712.3 | <b>240.2</b> | -42.3 | 169.7 | <b>70.5</b>  |
| Sn(OH)4         | 167.6    | -517.07732   | -1357586.5  | -1357418.9  |       |              | -8.7  |       |              |
| Sn(OH)4_F       | 177.8    | -616.97460   | -1619866.8  | -1619689.0  | 637.5 | <b>315.0</b> | -49.0 | 145.5 | <b>169.5</b> |
| Sn(SH)4         | 130.4    | -1807.54434  | -4745707.7  | -4745577.3  |       |              | -9.4  |       |              |
| Sn(SH)4_F       | 139.2    | -1907.44209  | -5007989.2  | -5007850.0  | 634.9 | <b>317.6</b> | -45.0 | 165.2 | <b>152.3</b> |
| SnMe4           | 420.2    | -373.36021   | -980257.2   | -979837.0   |       |              | -4.0  |       |              |
| SnMe4_F         | 422.9    | -473.19295   | -1242368.1  | -1241945.2  | 799.4 | <b>153.1</b> | -34.0 | 188.4 | <b>-35.4</b> |
| SnPh4           | 1037.3   | -1139.04899  | -2990573.1  | -2989535.8  |       |              | -14.1 |       |              |
| SnPh4_F         | 1042.1   | -1238.89428  | -3252716.9  | -3251674.8  | 768.6 | <b>183.9</b> | -45.3 | 183.1 | <b>0.8</b>   |
| Sn(CCH)4        | 235.9    | -520.45543   | -1366455.7  | -1366219.8  |       |              | -9.4  |       |              |
| Sn(CCH)4_F      | 240.6    | -620.32441   | -1628661.7  | -1628421.1  | 706.3 | <b>246.2</b> | -51.9 | 136.3 | <b>109.9</b> |
| Sn(C2F5)4       | 366.9    | -2513.73926  | -6599822.4  | -6599455.5  |       |              | -5.7  |       |              |
| Sn(C2F5)4_F     | 372.6    | -2613.65352  | -6862147.3  | -6861774.8  | 588.4 | <b>364.1</b> | -37.4 | 181.3 | <b>182.9</b> |
| Sn(C6F5)4       | 649.7    | -3124.16919  | -8202506.2  | -8201856.5  |       |              | -13.6 |       |              |
| Sn(C6F5)4_F     | 654.9    | -3224.11688  | -8464918.9  | -8464264.0  | 620.0 | <b>332.5</b> | -36.4 | 218.7 | <b>113.8</b> |
| Sn(OC6F5)4      | 702.7    | -3424.96983  | -8992258.3  | -8991555.6  |       |              | -15.2 |       |              |
| Sn(OC6F5)4_F    | 710.6    | -3524.97914  | -9254832.7  | -9254122.2  | 460.9 | <b>491.6</b> | -39.3 | 213.0 | <b>278.6</b> |
| Sn(OC(CF3))4    | 753.6122 | -4717.78679  | -12386549.2 | -12385795.6 |       |              | -9.5  |       |              |
| Sn(OC(CF3))4_F  | 760.0494 | -4817.78515  | -12649094.9 | -12648334.9 | 488.2 | <b>464.3</b> | -35.4 | 205.6 | <b>258.7</b> |
| Sn(OTf)4        | 411.1    | -4056.34295  | -10649928.4 | -10649517.3 |       |              | -13.2 |       |              |
| Sn(OTf)4_F      | 420.9    | -4156.31779  | -10912412.4 | -10911991.4 | 433.5 | <b>519.0</b> | -42.3 | 192.2 | <b>326.9</b> |
| PH5             | 124.9    | -343.81959   | -902698.3   | -902573.5   |       |              | -1.4  |       |              |
| PH5_F           | 136.9    | -443.66862   | -1164852.0  | -1164715.0  | 766.1 | <b>186.4</b> | -52.5 | 100.4 | <b>86.1</b>  |
| PF5             | 61.8     | -839.96198   | -2205320.2  | -2205258.4  |       |              | -1.8  |       |              |
| PF5_F           | 69.9     | -939.88476   | -2467667.4  | -2467597.5  | 568.5 | <b>384.0</b> | -51.0 | 108.3 | <b>275.7</b> |
| PCl5            | 46.9     | -2639.78434  | -6930753.8  | -6930706.9  |       |              | -6.2  |       |              |
| PCl5_F          | 56.6     | -2739.71242  | -7193115.0  | -7193058.3  | 556.2 | <b>396.3</b> | -46.6 | 145.0 | <b>251.3</b> |
| PBr5            | 43.3     | -13204.89922 | -34669462.9 | -34669419.6 |       |              | -8.7  |       |              |
| PBr5_F          | 53.5     | -13304.83116 | -34931834.2 | -34931780.7 | 546.5 | <b>406.0</b> | -46.7 | 155.1 | <b>250.9</b> |
| PI5             | 41.8     | -1827.99907  | -4799411.6  | -4799369.7  |       |              | -12.7 |       |              |
| PI5_F           | 52.1     | -1927.92528  | -5061767.8  | -5061715.7  | 561.7 | <b>390.8</b> | -47.2 | 169.8 | <b>221.1</b> |
| P(NH2)5         | 396.2    | -620.46017   | -1629018.2  | -1628621.9  |       |              | -7.7  |       |              |
| P(NH2)5_F       | 403.8    | -720.27647   | -1891085.9  | -1890682.0  | 847.5 | <b>105.0</b> | -52.6 | 126.2 | <b>-21.2</b> |
| P(OH)5          | 228.9    | -719.86945   | -1890017.2  | -1889788.4  |       |              | -7.0  |       |              |
| P(OH)5_F        | 234.4    | -819.71279   | -2152155.9  | -2151921.5  | 774.5 | <b>178.0</b> | -56.9 | 105.3 | <b>72.7</b>  |
| P(SH)5          | 170.1    | -2332.76043  | -6124662.5  | -6124492.4  |       |              | -9.0  |       |              |
| P(SH)5_F        | 177.9    | -2432.63865  | -6386892.8  | -6386714.9  | 685.1 | <b>267.4</b> | -47.0 | 155.0 | <b>112.4</b> |
| PMe5            | 537.1    | -540.13369   | -1418121.0  | -1417583.9  |       |              | -4.1  |       |              |
| PMe5_F          | 542.5    | -639.96449   | -1680226.8  | -1679684.2  | 807.2 | <b>145.3</b> | -45.3 | 141.8 | <b>3.5</b>   |
| PPh5            | 1303.4   | -1498.43855  | -3934150.4  | -3932847.0  |       |              | -15.6 |       |              |
| PPh5_F          | 1310.1   | -1598.34619  | -4196457.9  | -4195147.9  | 726.6 | <b>225.9</b> | -47.2 | 181.6 | <b>44.4</b>  |
| P(CCH)5         | 300.4    | -723.96977   | -1900782.6  | -1900482.2  |       |              | -10.3 |       |              |
| P(CCH)5_F       | 307.6    | -823.86065   | -2163046.1  | -2162738.6  | 651.3 | <b>301.2</b> | -55.9 | 123.6 | <b>177.6</b> |
| P(C2F5)5        | 463.4    | -3215.52283  | -8442355.2  | -8441891.8  |       |              | -6.4  |       |              |
| P(C2F5)5_F      | 471.1    | -3315.49132  | -8704822.4  | -8704351.4  | 448.1 | <b>504.4</b> | -37.3 | 184.5 | <b>320.0</b> |
| P(C6F5)5        | 816.6    | -3976.09874  | -10439247.2 | -10438430.6 |       |              | -14.8 |       |              |
| P(C6F5)5_F      | 823.2    | -4075.99701  | -10701530.2 | -10700707.0 | 617.9 | <b>334.6</b> | -37.7 | 218.3 | <b>116.3</b> |
| P(OC6F5)5       | 889.9    | -4351.97554  | -11426111.8 | -11425221.9 |       |              | -16.3 |       |              |
| P(OC6F5)5_F     | 899.0    | -4451.91985  | -11688515.6 | -11687616.6 | 499.6 | <b>452.9</b> | -39.5 | 216.7 | <b>236.2</b> |
| P(OC(CF3))5     | 946.2684 | -5967.16185  | -15666783.4 | -15665837.2 |       |              | -10.1 |       |              |
| P(OC(CF3))5_F   | 953.04   | -6067.11680  | -15929215.2 | -15928262.1 | 469.3 | <b>483.2</b> | -34.8 | 210.8 | <b>272.4</b> |
| P(OTf)5         | 520.9534 | -5143.77129  | -13504971.5 | -13504450.6 |       |              | -13.5 |       |              |
| P(OTf)5_F       | 531.8214 | -5243.76082  | -13767494.0 | -13766962.2 | 396.0 | <b>556.5</b> | -42.7 | 191.7 | <b>364.9</b> |
| AsH5            | 115.0    | -2237.40186  | -5874298.6  | -5874183.6  |       |              | -1.2  |       |              |
| AsH5_F          | 124.9    | -2337.24233  | -6136429.7  | -6136304.9  | 786.4 | <b>166.1</b> | -50.9 | 105.9 | <b>60.2</b>  |
| AsF5            | 55.5     | -2733.48473  | -7176764.2  | -7176708.6  |       |              | -2.4  |       |              |
| AsF5_F          | 63.8     | -2833.42848  | -7439166.5  | -7439102.7  | 513.6 | <b>438.9</b> | -49.8 | 115.6 | <b>323.4</b> |
| AsCl5           | 44.6     | -4533.39021  | -11902416.0 | -11902371.4 |       |              | -6.4  |       |              |
| AsCl5_F         | 54.0     | -4633.31975  | -12164781.0 | -12164727.1 | 551.9 | <b>400.6</b> | -46.5 | 146.2 | <b>254.3</b> |
| AsBr5           | 41.8     | -15098.51787 | -39641158.7 | -39641116.8 |       |              | -8.8  |       |              |
| AsBr5_F         | 51.5     | -15198.44448 | -39903516.0 | -39903464.5 | 559.9 | <b>392.6</b> | -46.9 | 154.5 | <b>238.1</b> |
| AsI5            | 40.8     | -3728.91371  | -9790262.9  | -9790222.1  |       |              | -12.6 |       |              |
| AsI5_F          | 50.5     | -3828.82824  | -10052588.5 | -10052538.1 | 591.6 | <b>360.9</b> | -47.3 | 169.1 | <b>191.8</b> |
| As(NH2)5        | 388.2    | -2514.01493  | -6600546.2  | -6600158.0  |       |              | -8.1  |       |              |
| As(NH2)5_F      | 395.3    | -2613.85495  | -6862676.2  | -6862280.9  | 784.8 | <b>167.7</b> | -52.4 | 128.9 | <b>38.8</b>  |
| As(OH)5         | 220.2    | -2613.40632  | -6861498.3  | -6861278.1  |       |              | -7.4  |       |              |
| As(OH)5_F       | 226.4    | -2713.27429  | -7123701.6  | -7123475.2  | 710.5 | <b>242.0</b> | -56.3 | 109.4 | <b>132.6</b> |
| As(SH)5         | 166.5    | -4226.36451  | -11096320.0 | -11096153.5 |       |              | -9.3  |       |              |

|                |          |              |             |             |       |              |       |       |              |
|----------------|----------|--------------|-------------|-------------|-------|--------------|-------|-------|--------------|
| As(SH)5_F      | 174.2    | -4326.24610  | -11358559.1 | -11358384.9 | 676.2 | <b>276.3</b> | -47.1 | 156.2 | <b>120.0</b> |
| AsMe5          | 530.2    | -2433.71772  | -6389725.9  | -6389195.7  |       |              | -4.3  |       |              |
| AsMe5_F        | 534.5    | -2533.55195  | -6651840.7  | -6651306.1  | 797.1 | <b>155.4</b> | -45.6 | 141.4 | <b>13.9</b>  |
| AsPh5          | 1299.1   | -3392.64604  | -8907392.2  | -8906093.1  |       |              | -15.8 |       |              |
| AsPh5_F        | 1305.2   | -3492.55377  | -9169699.9  | -9168394.7  | 725.9 | <b>226.6</b> | -48.3 | 178.0 | <b>48.7</b>  |
| As(CCH)5       | 296.5    | -2617.55107  | -6872380.3  | -6872083.8  |       |              | -11.5 |       |              |
| As(CCH)5_F     | 303.2    | -2717.43590  | -7134628.0  | -7134324.7  | 666.7 | <b>285.8</b> | -56.2 | 127.0 | <b>158.8</b> |
| As(C2F5)5      | 460.1    | -5109.16369  | -13414109.3 | -13413649.1 |       |              | -6.6  |       |              |
| As(C2F5)5_F    | 466.7    | -5209.09145  | -13676469.6 | -13676002.9 | 553.9 | <b>398.6</b> | -37.6 | 184.4 | <b>214.2</b> |
| As(C6F5)5      | 813.2    | -5869.69662  | -15410888.5 | -15410075.3 |       |              | -15.1 |       |              |
| As(C6F5)5_F    | 819.5    | -5969.59133  | -15673162.0 | -15672342.5 | 627.0 | <b>325.5</b> | -38.2 | 217.5 | <b>108.0</b> |
| As(OC6F5)5     | 885.3    | -6245.50947  | -16397585.1 | -16396699.8 |       |              | -16.6 |       |              |
| As(OC6F5)5_F   | 893.2    | -6345.47468  | -16660043.8 | -16659150.6 | 443.5 | <b>509.0</b> | -39.9 | 216.3 | <b>292.7</b> |
| As(OC(CF3))5   | 942.2138 | -7860.74065  | -20638374.6 | -20637432.4 |       |              | -10.3 |       |              |
| As(OC(CF3))5_F | 949.1944 | -7960.70352  | -20900827.1 | -20899877.9 | 448.8 | <b>503.7</b> | -35.0 | 210.6 | <b>293.1</b> |
| As(OTf)5       | 515.3    | -7037.32335  | -18476492.5 | -18475977.2 |       |              | -13.8 |       |              |
| As(OTf)5_F     | 525.9    | -7137.32848  | -18739055.9 | -18738530.0 | 354.8 | <b>597.7</b> | -42.5 | 193.7 | <b>404.0</b> |
| SbH5           | 102.9    | -242.77354   | -637401.9   | -637299.0   |       |              | -1.5  |       |              |
| SbH5_F         | 111.0    | -342.63349   | -899584.2   | -899473.2   | 733.4 | <b>219.1</b> | -47.8 | 120.1 | <b>99.0</b>  |
| SbF5           | 52.0828  | -738.87245   | -1939909.6  | -1939857.5  |       |              | -4.6  |       |              |
| SbF5_F         | 60.3174  | -838.83775   | -2202368.5  | -2202308.2  | 457.0 | <b>495.5</b> | -47.7 | 133.7 | <b>361.9</b> |
| SbCl5          | 43.8     | -2538.87720  | -6665822.1  | -6665778.3  |       |              | -7.2  |       |              |
| SbCl5_F        | 52.9     | -2638.82109  | -6928224.8  | -6928171.8  | 514.1 | <b>438.4</b> | -45.6 | 153.3 | <b>285.1</b> |
| SbBr5          | 41.4     | -13150.07107 | -34525511.6 | -34525470.2 |       |              | -9.4  |       |              |
| SbBr5_F        | 50.7     | -13250.00537 | -34787889.1 | -34787838.4 | 539.4 | <b>413.1</b> | -46.4 | 159.2 | <b>254.0</b> |
| SbI5           | 40.6     | -1727.06082  | -4534398.2  | -4534357.6  |       |              | -13.1 |       |              |
| SbI5_F         | 49.9     | -1826.99013  | -4796762.6  | -4796712.7  | 552.5 | <b>400.0</b> | -47.4 | 170.3 | <b>229.7</b> |
| Sb(NH2)5       | 379.8    | -519.38483   | -1363644.9  | -1363265.1  |       |              | -9.3  |       |              |
| Sb(NH2)5_F     | 388.4    | -619.25568   | -1625855.8  | -1625467.4  | 705.3 | <b>247.2</b> | -51.9 | 135.8 | <b>111.4</b> |
| Sb(OH)5        | 213.7    | -618.77939   | -1624605.3  | -1624391.6  |       |              | -9.0  |       |              |
| Sb(OH)5_F      | 221.2    | -718.67792   | -1886888.9  | -1886667.7  | 631.5 | <b>321.0</b> | -55.0 | 121.6 | <b>199.4</b> |
| Sb(SH)5        | 164.1    | -2231.82141  | -5859647.1  | -5859483.0  |       |              | -10.0 |       |              |
| Sb(SH)5_F      | 172.1    | -2331.72413  | -6121941.7  | -6121769.6  | 621.0 | <b>331.5</b> | -46.7 | 160.1 | <b>171.4</b> |
| SbMe5          | 524.4    | -439.09807   | -1152852.0  | -1152327.6  |       |              | -4.8  |       |              |
| SbMe5_F        | 525.7    | -538.95268   | -1415020.3  | -1414494.6  | 740.6 | <b>211.9</b> | -45.3 | 144.3 | <b>67.6</b>  |
| SbPh5          | 1296.2   | -1397.28998  | -3668584.8  | -3667288.7  |       |              | -16.0 |       |              |
| SbPh5_F        | 1301.4   | -1497.21927  | -3930949.2  | -3929647.7  | 668.4 | <b>284.1</b> | -49.2 | 174.9 | <b>109.2</b> |
| Sb(CCH)5       | 293.7    | -622.94023   | -1635529.6  | -1635235.9  |       |              | -11.5 |       |              |
| Sb(CCH)5_F     | 299.8    | -722.84141   | -1897820.1  | -1897520.3  | 623.2 | <b>329.3</b> | -56.3 | 126.5 | <b>202.8</b> |
| Sb(C2F5)5      | 457.7    | -3114.55892  | -8177274.5  | -8176816.8  |       |              | -6.7  |       |              |
| Sb(C2F5)5_F    | 464.3    | -3214.50124  | -8439673.0  | -8439208.7  | 515.7 | <b>436.8</b> | -37.7 | 184.3 | <b>252.5</b> |
| Sb(C6F5)5      | 811.1    | -3877.55579  | -10180522.7 | -10179711.6 |       |              | -15.8 |       |              |
| Sb(C6F5)5_F    | 817.4    | -3977.52348  | -10442987.9 | -10442170.5 | 568.6 | <b>383.9</b> | -38.9 | 217.0 | <b>166.9</b> |
| Sb(OC6F5)5     | 879.1    | -4253.59350  | -11167809.7 | -11166930.6 |       |              | -16.8 |       |              |
| Sb(OC6F5)5_F   | 890.1    | -4353.62353  | -11430438.6 | -11429548.5 | 409.6 | <b>542.9</b> | -40.2 | 216.3 | <b>326.6</b> |
| Sb(OC(CF3))5   | 941.545  | -5869.52591  | -15410440.3 | -15409498.7 |       |              | -9.7  |       |              |
| Sb(OC(CF3))5_F | 946.6028 | -5969.55980  | -15673079.3 | -15672132.7 | 393.5 | <b>559.0</b> | -37.8 | 196.4 | <b>362.6</b> |
| Sb(OTf)5       | 512.9    | -5042.74439  | -13239725.4 | -13239212.5 |       |              | -14.8 |       |              |
| Sb(OTf)5_F     | 523.5    | -5142.74813  | -13502285.2 | -13501761.7 | 358.4 | <b>594.1</b> | -42.7 | 197.0 | <b>397.2</b> |
| <b>Ox3</b>     |          |              |             |             |       |              |       |       |              |
| PH3            | 75.6998  | -342.70935   | -899783.4   | -899707.7   |       |              | -1.1  |       |              |
| PH3_F          | 82.1788  | -442.50927   | -1161808.1  | -1161725.9  | 889.4 | <b>63.1</b>  | -54.8 | 89.3  | <b>-26.2</b> |
| PF3            | 36.1152  | -640.35404   | -1681249.5  | -1681213.4  |       |              | -1.7  |       |              |
| PF3_F          | 43.5138  | -740.20631   | -1943411.7  | -1943368.2  | 752.9 | <b>199.6</b> | -52.6 | 100.9 | <b>98.7</b>  |
| PCl3           | 29.0928  | -1720.27177  | -4516573.5  | -4516544.4  |       |              | -4.3  |       |              |
| PCl3_F         | 37.7454  | -1820.14924  | -4778801.8  | -4778764.1  | 688.0 | <b>264.5</b> | -49.9 | 123.2 | <b>141.4</b> |
| PBr3           | 27.2954  | -8059.34160  | -21159801.4 | -21159774.1 |       |              | -5.8  |       |              |
| PBr3_F         | 36.5332  | -8159.22741  | -21422051.6 | -21422015.0 | 666.6 | <b>285.9</b> | -50.1 | 128.4 | <b>157.5</b> |
| P(C2F5)3       | 280.7706 | -2065.75687  | -5423644.7  | -5423363.9  |       |              | -4.5  |       |              |
| P(C2F5)3_F     | 286.0792 | -2165.63670  | -5685879.2  | -5685593.1  | 678.4 | <b>274.1</b> | -40.5 | 163.2 | <b>110.9</b> |
| P(OC(CF3))3    | 571.4478 | -3716.76527  | -9758367.2  | -9757795.8  |       |              | -7.6  |       |              |
| P(OC(CF3))3_F  | 576.5056 | -3816.65698  | -10020632.9 | -10020056.4 | 633.7 | <b>318.8</b> | -36.7 | 192.4 | <b>126.5</b> |
| AsH3           | 70.6002  | -2236.31330  | -5871440.6  | -5871370.0  |       |              | -10.3 |       |              |
| AsH3_F         | 76.4104  | -2336.11720  | -6133475.7  | -6133399.3  | 878.3 | <b>74.2</b>  | -52.7 | 136.4 | <b>-62.2</b> |
| AsF3           | 32.8966  | -2533.93586  | -6652848.6  | -6652815.7  |       |              | -3.2  |       |              |
| AsF3_F         | 40.4206  | -2633.80498  | -6915055.0  | -6915014.6  | 708.7 | <b>243.8</b> | -52.2 | 109.1 | <b>134.7</b> |
| AsCl3          | 27.5462  | -3613.89140  | -9488271.9  | -9488244.3  |       |              | -5.0  |       |              |
| AsCl3_F        | 35.948   | -3713.77325  | -9750511.7  | -9750475.7  | 676.2 | <b>276.3</b> | -49.0 | 130.0 | <b>146.3</b> |
| AsBr3          | 26.2086  | -9952.96780  | -26131517.0 | -26131490.8 |       |              | -6.2  |       |              |
| AsBr3_F        | 34.9866  | -10052.85334 | -26393766.4 | -26393731.5 | 666.9 | <b>285.6</b> | -48.8 | 136.1 | <b>149.5</b> |
| As(C2F5)3      | 277.761  | -3959.37077  | -10395328.0 | -10395050.2 |       |              | -4.6  |       |              |
| As(C2F5)3_F    | 283.2786 | -4059.24812  | -10657555.9 | -10657272.7 | 685.2 | <b>267.3</b> | -39.5 | 167.8 | <b>99.5</b>  |
| As(OC(CF3))3   | 568.3546 | -5610.35740  | -14729993.4 | -14729425.0 |       |              | -10.3 |       |              |
| As(OC(CF3))3_F | 573.3288 | -5710.25743  | -14992280.9 | -14991707.6 | 611.7 | <b>340.8</b> | -37.0 | 202.4 | <b>138.4</b> |
| SbH3           | 62.5746  | -241.68416   | -634541.8   | -634479.2   |       |              | 0.5   |       |              |
| SbH3_F         | 68.4266  | -341.50891   | -896631.7   | -896563.2   | 823.6 | <b>128.9</b> | -49.1 | 106.5 | <b>22.4</b>  |
| SbF3           | 31.2246  | -539.34091   | -1416039.6  | -1416008.3  |       |              | -6.0  |       |              |
| SbF3_F         | 38.9576  | -639.22758   | -1678292.0  | -1678253.1  | 662.9 | <b>289.6</b> | -51.6 | 123.1 | <b>166.5</b> |
| SbCl3          | 27.0446  | -1619.31369  | -4251508.1  | -4251481.0  |       |              | -6.8  |       |              |
| SbCl3_F        | 35.3628  | -1719.20793  | -4513780.4  | -4513745.1  | 643.6 | <b>308.9</b> | -48.3 | 140.3 | <b>168.6</b> |
| SbBr3          | 25.8324  | -7958.39073  | -20894754.9 | -20894729.0 |       |              | -7.6  |       |              |
| SbBr3_F        | 34.4432  | -8058.28723  | -21157033.1 | -21156998.7 | 638.0 | <b>314.5</b> | -47.9 | 145.3 | <b>169.2</b> |
| Sb(C2F5)3      | 275.9218 | -1964.75386  | -5158461.3  | -5158185.3  |       |              | -5.4  |       |              |
| Sb(C2F5)3_F    | 281.3976 | -2064.64934  | -5420736.8  | -5420455.4  | 637.5 | <b>315.0</b> | -39.2 | 172.8 | <b>142.1</b> |
| Sb(OC(CF3))3   | 566.599  | -3617.82782  | -9498606.9  | -9498040.3  |       |              | -10.7 |       |              |
| Sb(OC(CF3))3_F | 572.2002 | -3717.80201  | -9761089.2  | -9760517.0  | 550.8 | <b>401.7</b> | -35.2 | 211.2 | <b>190.4</b> |
| <b>Ox4</b>     |          |              |             |             |       |              |       |       |              |
| SH4            | 103.5804 | -400.01719   | -1050245.1  | -1050141.5  |       |              | -1.2  |       |              |
| SH4_F          | 109.6832 | -499.80327   | -1312233.5  | -1312123.8  | 925.4 | <b>27.1</b>  | -61.1 | 63.3  | <b>-36.2</b> |
| SF4            | 47.1086  | -796.78978   | -2091971.6  | -2091924.5  |       |              | -2.1  |       |              |

|                         |           |             |             |             |       |              |       |       |              |
|-------------------------|-----------|-------------|-------------|-------------|-------|--------------|-------|-------|--------------|
| SF4_F                   | 53.6294   | -896.65070  | -2354156.4  | -2354102.8  | 729.3 | <b>223.2</b> | -51.9 | 105.7 | <b>117.5</b> |
| S(C2F5)4                | 371.5602  | -2697.40929 | -7082048.1  | -7081676.5  |       |              | -5.7  |       |              |
| S(C2F5)4_F              | 375.6984  | -2797.24740 | -7344173.1  | -7343797.4  | 786.8 | <b>165.7</b> | -38.1 | 178.6 | <b>-12.9</b> |
| S(OC(CF3))4             | 757.3742  | -4898.67427 | -12861469.3 | -12860711.9 |       |              | -9.0  |       |              |
| S(OC(CF3))4_F           | 762.5992  | -4998.56592 | -13123734.8 | -13122972.2 | 634.0 | <b>318.5</b> | -35.8 | 201.8 | <b>116.7</b> |
| SeH4                    | 93.841    | -2402.44995 | -6307632.4  | -6307538.5  |       |              | 0.1   |       |              |
| SeH4_F                  | 98.1046   | -2502.23793 | -6569625.7  | -6569527.6  | 918.5 | <b>34.0</b>  | -52.8 | 92.4  | <b>-58.5</b> |
| SeF4                    | 43.1376   | -2799.25620 | -7349447.1  | -7349404.0  |       |              | -3.7  |       |              |
| SeF4_F                  | 50.369    | -2899.14353 | -7611701.3  | -7611651.0  | 660.6 | <b>291.9</b> | -51.3 | 115.0 | <b>176.9</b> |
| Se(C2F5)4               | 368.7178  | -4699.86733 | -12339501.7 | -12339133.0 |       |              | -5.9  |       |              |
| Se(C2F5)4_F             | 373.5666  | -4799.73047 | -12601692.3 | -12601318.8 | 721.8 | <b>230.7</b> | -38.0 | 179.9 | <b>50.8</b>  |
| Se(OC(CF3))4            | 754.5736  | -6901.14652 | -18118960.2 | -18118205.6 |       |              | -9.2  |       |              |
| Se(OC(CF3))4_F          | 760.342   | -7001.05655 | -18381274.0 | -18380513.6 | 586.3 | <b>366.2</b> | -35.5 | 204.1 | <b>162.1</b> |
| TeH4                    | 83.7672   | -269.97162  | -708810.5   | -708726.7   |       |              | -0.4  |       |              |
| TeH4_F                  | 87.2784   | -369.78873  | -970880.3   | -970793.0   | 841.3 | <b>111.2</b> | -49.0 | 110.5 | <b>0.7</b>   |
| TeF4                    | 41.4238   | -666.84304  | -1750796.4  | -1750755.0  |       |              | -6.3  |       |              |
| TeF4_F                  | 48.906    | -766.75184  | -2013106.9  | -2013058.0  | 604.5 | <b>348.0</b> | -50.6 | 128.8 | <b>219.1</b> |
| Te(C2F5)4               | 366.7532  | -2567.39137 | -6740686.0  | -6740319.3  |       |              | -6.6  |       |              |
| Te(C2F5)4_F             | 372.3544  | -2667.30391 | -7003006.4  | -7002634.1  | 592.8 | <b>359.7</b> | -38.1 | 181.9 | <b>177.8</b> |
| Te(OC(CF3))4            | 753.6958  | -4771.42671 | -12527380.8 | -12526627.1 |       |              | -9.7  |       |              |
| Te(OC(CF3))4_F          | 759.8404  | -4871.41173 | -12789891.5 | -12789131.7 | 522.9 | <b>429.6</b> | -35.8 | 204.7 | <b>224.9</b> |
| Special Acids           |           |             |             |             |       |              |       |       |              |
| B(C6F4-pCF3)3           | 624.1158  | -2920.61801 | -7668082.6  | -7667458.5  |       |              | -12.7 |       |              |
| B(C6F4-pCF3)3_F         | 631.4726  | -3020.62520 | -7930651.5  | -7930020.0  | 465.9 | <b>486.6</b> | -37.7 | 209.5 | <b>277.0</b> |
| B(OTeF5)3               | 224.1734  | -2551.45028 | -6698832.7  | -6698608.5  |       |              | -8.1  |       |              |
| B(OTeF5)3_F             | 228.1444  | -2651.46356 | -6961417.6  | -6961189.4  | 446.6 | <b>505.9</b> | -37.2 | 192.2 | <b>313.7</b> |
| B(OC5F4N)3              | 509.8346  | -2183.62820 | -5733115.8  | -5732606.0  |       |              | -13.3 |       |              |
| B(OC5F4N)3_F            | 515.394   | -2283.62542 | -5995658.5  | -5995143.2  | 490.3 | <b>462.2</b> | -39.2 | 205.9 | <b>256.3</b> |
| F4C6(1,2-B(C6F5)2)2     | 828.0998  | -3587.48528 | -9418942.6  | -9418114.5  |       |              | -14.8 |       |              |
| F4C6(1,2-B(C6F5)2)2_F   | 835.5402  | -3687.49803 | -9681526.1  | -9680690.5  | 451.4 | <b>501.1</b> | -37.7 | 218.4 | <b>282.7</b> |
| perfluoroborole         | 898.4492  | -3814.71597 | -10015536.8 | -10014638.3 |       |              | -16.6 |       |              |
| perfluoroborole_F       | 905.4716  | -3914.72109 | -10278100.2 | -10277194.8 | 471.0 | <b>481.5</b> | -41.0 | 211.9 | <b>269.6</b> |
| F4C6(1,2-(B(C12F8)))2   | 787.8464  | -3188.26217 | -8370782.3  | -8369994.5  |       |              | -13.3 |       |              |
| F4C6(1,2-(B(C12F8)))2_F | 790.3126  | -3288.26779 | -8633347.1  | -8632556.8  | 465.2 | <b>487.3</b> | -37.9 | 211.2 | <b>276.1</b> |
| Al(OTeF5)3              | 213.5562  | -2768.94934 | -7269876.5  | -7269662.9  |       |              | -8.3  |       |              |
| Al(OTeF5)3_F            | 220.495   | -2868.99890 | -7532556.6  | -7532336.1  | 354.3 | <b>598.2</b> | -37.3 | 192.6 | <b>405.6</b> |
| Al(OC5F4N)3             | 497.838   | -2401.10878 | -6304111.1  | -6303613.3  |       |              | -15.6 |       |              |
| Al(OC5F4N)3_F           | 504.4006  | -2501.15678 | -6566787.1  | -6566282.7  | 358.0 | <b>594.5</b> | -38.8 | 216.8 | <b>377.7</b> |
| Al(OC(C6F5)3)3          | 1564.574  | -7129.87190 | -18719478.7 | -18717914.1 |       |              | -23.8 |       |              |
| Al(OC(C6F5)3)3_F        | 1574.4388 | -7229.90008 | -18982102.7 | -18980528.2 | 413.3 | <b>539.2</b> | -41.9 | 238.2 | <b>301.0</b> |
| As(OTeF5)5              | 350.1168  | -6446.21142 | -16924528.1 | -16924178.0 |       |              | -9.7  |       |              |
| As(OTeF5)5_F            | 360.943   | -6546.25550 | -17187193.8 | -17186832.9 | 372.6 | <b>579.9</b> | -35.5 | 206.2 | <b>373.7</b> |
| Sb(OTeF5)5              | 350.0332  | -4450.88550 | -11685799.9 | -11685449.8 |       |              | -10.0 |       |              |
| Sb(OTeF5)5_F            | 358.6022  | -4550.94517 | -11948506.5 | -11948147.9 | 329.4 | <b>623.1</b> | -35.6 | 206.8 | <b>416.3</b> |

### Comparisons

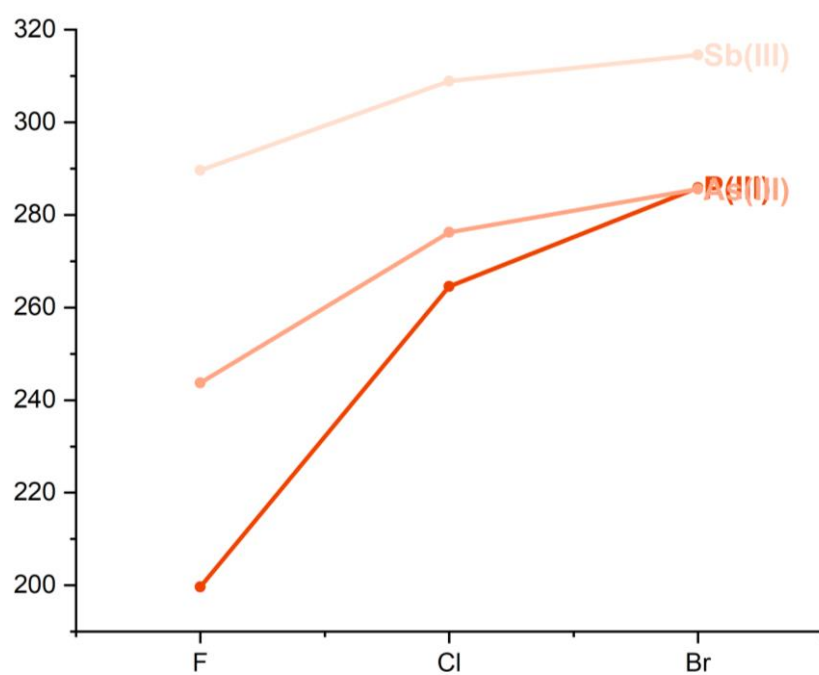

**Figure S1:** Comparisons of computed FIA for group 15(III) halides.

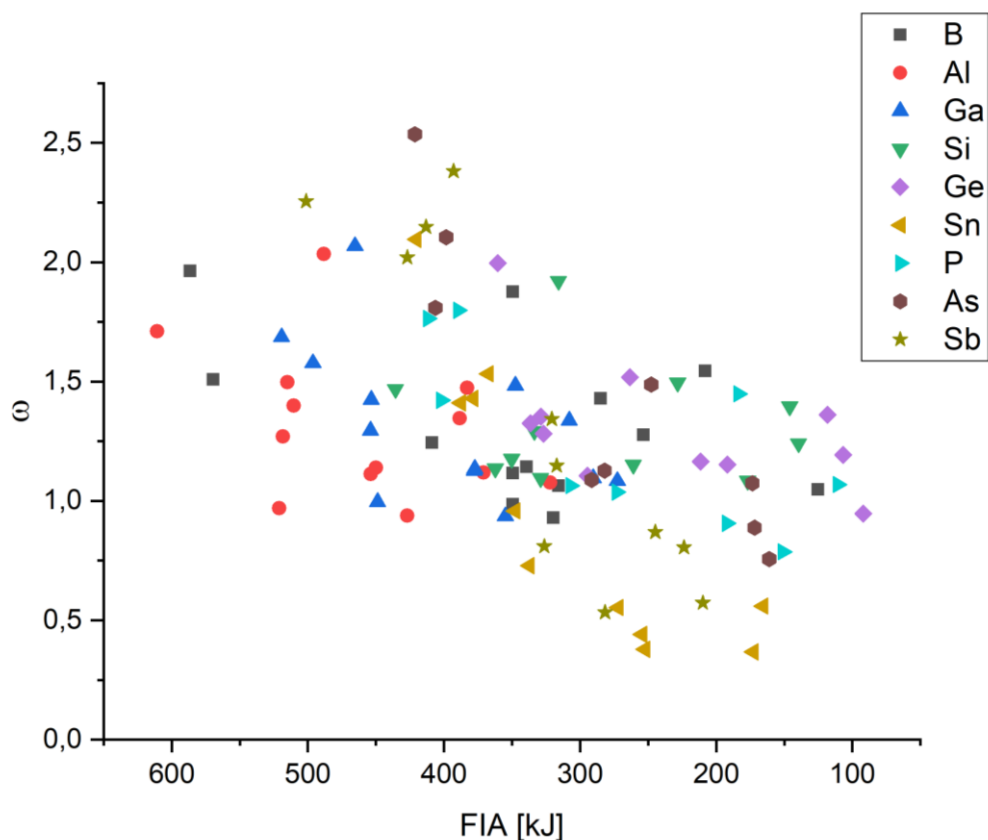

**Figure S2:** Comparisons of computed FIA with the global electrophilicity index, obtained from the PBEh-3c HOMO/LUMO energies.

## Literature

- [1] F. Neese, *Wires. Comput. Mol. Sci.* **2012**, *2*, 73-78.
- [2] S. Grimme, J. G. Brandenburg, C. Bannwarth, A. Hansen, *J. Chem. Phys.* **2015**, *143*, 054107.
- [3] S. Grimme, *Chem-Eur. J.* **2012**, *18*, 9955-9964.
- [4] G. D. P. III, R. J. Bartlett, *J. Chem. Phys.* **1982**, *76*, 1910-1918.
- [5] T. J. Lee, P. R. Taylor, *Int. J. Quantum Chem* **1989**, *36*, 199-207.
- [6] a) R. A. Kendall, T. H. Dunning, R. J. Harrison, *J. Chem. Phys.* **1992**, *96*, 6796-6806; b) D. E. Woon, T. H. Dunning, *J. Chem. Phys.* **1993**, *98*, 1358-1371; c) A. K. Wilson, D. E. Woon, K. A. Peterson, T. H. D. Jr., *J. Chem. Phys.* **1999**, *110*, 7667-7676.
- [7] a) B. Metz, H. Stoll, M. Dolg, *J. Chem. Phys.* **2000**, *113*, 2563-2569; b) K. A. Peterson, K. E. Yousaf, *J. Chem. Phys.* **2010**, *133*, 174116.
- [8] a) T. Helgaker, W. Klopper, H. Koch, J. Noga, *J. Chem. Phys.* **1997**, *106*, 9639-9646; b) A. Halkier, T. Helgaker, P. Jørgensen, W. Klopper, H. Koch, J. Olsen, A. K. Wilson, *Chem. Phys. Lett.* **1998**, *286*, 243-252; c) F. Neese, E. F. Valeev, *J. Chem. Theo. Comp.* **2011**, *7*, 33-43; d) D. G. Liakos, F. Neese, *J. Phys. Chem. A* **2012**, *116*, 4801-4816.
- [9] J. Friedrich, E. Perlt, M. Roatsch, C. Spickermann, B. Kirchner, *J. Chem. Theo. Comp.* **2011**, *7*, 843-851.
- [10] M. J. Frisch, G. W. Trucks, H. B. Schlegel, G. E. Scuseria, M. A. Robb, J. R. Cheeseman, G. Scalmani, V. Barone, G. A. Petersson, H. Nakatsuji, X. Li, M. Caricato, A. V. Marenich, J. Bloino, B. G. Janesko, R. Gomperts, B. Mennucci, H. P. Hratchian, J. V. Ortiz, A. F. Izmaylov, J. L. Sonnenberg, Williams, F. Ding, F. Lipparini, F. Egidi, J. Goings, B. Peng, A. Petrone, T. Henderson, D. Ranasinghe, V. G. Zakrzewski, J. Gao, N. Rega, G. Zheng, W. Liang, M. Hada, M. Ehara, K. Toyota, R. Fukuda, J. Hasegawa, M. Ishida, T. Nakajima, Y. Honda, O. Kitao, H. Nakai,

- T. Vreven, K. Throssell, J. A. Montgomery Jr., J. E. Peralta, F. Ogliaro, M. J. Bearpark, J. J. Heyd, E. N. Brothers, K. N. Kudin, V. N. Staroverov, T. A. Keith, R. Kobayashi, J. Normand, K. Raghavachari, A. P. Rendell, J. C. Burant, S. S. Iyengar, J. Tomasi, M. Cossi, J. M. Millam, M. Klene, C. Adamo, R. Cammi, J. W. Ochterski, R. L. Martin, K. Morokuma, O. Farkas, J. B. Foresman, D. J. Fox, Wallingford, CT, **2016**.
- [11] L. A. Curtiss, P. C. Redfern, K. Raghavachari, *J. Chem. Phys.* **2007**, *126*, 084108.
- [12] a) F. Neese, A. Hansen, D. G. Liakos, *J. Chem. Phys.* **2009**, *131*; b) C. Riplinger, F. Neese, *J. Chem. Phys.* **2013**, *138*; c) C. Riplinger, B. Sandhoefer, A. Hansen, F. Neese, *J. Chem. Phys.* **2013**, *139*.
- [13] F. Neese, F. Wennmohs, A. Hansen, U. Becker, *Chem. Phys.* **2009**, *356*, 98-109.
- [14] a) J. P. Perdew, *Phys. Rev. B* **1986**, *33*, 8822-8824; b) A. D. Becke, *Phys. Rev. A* **1988**, *38*, 3098-3100.
- [15] a) S. Grimme, J. Antony, S. Ehrlich, H. Krieg, *J. Chem. Phys.* **2010**, *132*, 154104; b) S. Grimme, J. Antony, S. Ehrlich, H. Krieg, *J. Chem. Phys.* **2010**, *132*; c) S. Grimme, S. Ehrlich, L. Goerigk, *J. Comput. Chem.* **2011**, *32*, 1456-1465; d) E. R. Johnson, A. D. Becke, *J. Chem. Phys.* **2005**, *123*; e) A. D. Becke, E. R. Johnson, *J. Chem. Phys.* **2005**, *122*.
- [16] A. Schafer, C. Huber, R. Ahlrichs, *J. Chem. Phys.* **1994**, *100*, 5829-5835.
- [17] A. D. Becke, *J. Chem. Phys.* **1993**, *98*, 5648-5652.
- [18] Y. Zhao, D. G. Truhlar, *J. Phys. Chem. A* **2005**, *109*, 5656-5667.
- [19] a) F. Weigend, F. Furche, R. Ahlrichs, *J. Chem. Phys.* **2003**, *119*, 12753-12762; b) F. Weigend, R. Ahlrichs, *Phys. Chem. Chem. Phys.* **2005**, *7*, 3297-3305.
- [20] Y. Zhao, D. G. Truhlar, *Theor. Chem. Acc.* **2008**, *120*, 215-241.
- [21] S. Grimme, *J. Chem. Phys.* **2006**, *124*, 034108.
- [22] S. Kozuch, D. Gruzman, J. M. L. Martin, *J. Phys. Chem. C* **2010**, *114*, 20801-20808.
- [23] S. Kozuch, J. M. L. Martin, *J. Comput. Chem.* **2013**, *34*, 2327-2344.
- [24] S. Kozuch, J. M. L. Martin, *Phys. Chem. Chem. Phys.* **2011**, *13*, 20104-20107.
- [25] K. Eichkorn, O. Treutler, H. Ohm, M. Haser, R. Ahlrichs, *Chem. Phys. Lett.* **1995**, *242*, 652-660.
- [26] K. Eichkorn, F. Weigend, O. Treutler, R. Ahlrichs, *Theor. Chem. Acc.* **1997**, *97*, 119-124.
- [27] a) J. Tomasi, B. Mennucci, R. Cammi, *Chem. Rev.* **2005**, *105*, 2999-3094; b) A. Klamt, B. Mennucci, J. Tomasi, V. Barone, C. Curutchet, M. Orozco, F. J. Luque, *Acc. Chem. Res.* **2009**, *42*, 489-492.
- [28] a) E. J. Baerends, T. Ziegler, A. J. Atkins, J. Autschbach, D. Bashford, O. Baseggio, A. Brces, F. M. Bickelhaupt, C. Bo, P. M. Boerrigter, L. Cavallo, C. Daul, D. P. Chong, D. V. Chulhai, L. Deng, R. M. Dickson, J. M. Dieterich, D. E. Ellis, M. van Faassen, A. Ghysels, A. Giammona, S. J. A. van Gisbergen, A. Goetz, A. W. Gtz, S. Gusarov, F. E. Harris, P. van den Hoek, Z. Hu, C. R. Jacob, H. Jacobsen, L. Jensen, L. Joubert, J. W. Kaminski, G. van Kessel, C. Knig, F. Kootstra, A. Kovalenko, M. Krykunov, E. van Lenthe, D. A. McCormack, A. Michalak, M. Mitoraj, S. M. Morton, J. Neugebauer, V. P. Nicu, L. Noodleman, V. P. Osinga, S. Patchkovskii, M. Pavanello, C. A. Peeples, P. H. T. Philipsen, D. Post, C. C. Pye, H. Ramanantoanina, P. Ramos, W. Ravenek, J. I. Rodriguez, P. Ros, R. Rger, P. R. T. Schipper, D. Schlins, H. van Schoot, G. Schreckenbach, J. S. Seldenthuis, M. Seth, J. G. Snijders, Sol; b) C. C. Pye, T. Ziegler, E. van Lenthe, J. N. Louwen, *Can. J. Chem.* **2009**, *87*, 790-797.
- [29] E. Van Lenthe, E. J. Baerends, *J. Comput. Chem.* **2003**, *24*, 1142-1156.
- [30] a) F. Eckert, A. Klamt, *AIChE J.* **2002**, *48*, 369-385; b) A. Klamt, M. Diedenhofen, *J. Comput. Aided Mol. Des.* **2010**, *24*, 357-360; c) A. Klamt, *J. Phys. Chem.* **1995**, *99*, 2224-2235; d) A. Klamt, B. Mennucci, J. Tomasi, V. Barone, C. Curutchet, M. Orozco, F. J. Luque, *Acc. Chem. Res.* **2009**, *42*, 489-492.
- [31] R. Franke, B. Hannebauer, *Phys. Chem. Chem. Phys.* **2011**, *13*, 21344-21350.
- [32] F. Eckert, I. Leito, I. Kaljurand, A. Kütt, A. Klamt, M. Diedenhofen, *J. Comput. Chem.* **2009**, *30*, 799-810.
- [33] a) A. Ben-Naim, Y. Marcus, *J. Chem. Phys.* **1984**, *81*, 2016-2027; b) D. M. Camaioni, C. A. Schwerdtfeger, *J. Phys. Chem. A* **2005**, *109*, 10795-10797.
